# Supplementary material for: Generation and Characterization of an Influenza D Reporter Virus
Source: Viruses. 2023 Dec 16;15(12):2444. doi: 10.3390/v15122444 (PMC10747006; doi:10.3390/v15122444)
Supplement: Supplementary file 1 [file viruses-15-02444-s001.zip]

Archive with 4 entries (4 files):
- SupFigure S1.pdf
- SupFigure S2.pdf
- Table_S1.xlsx
- Table_S2.xlsx
