# Supplementary material for: Generation and Characterization of an Influenza D Reporter Virus
Source: Viruses. 2023 Dec 16;15(12):2444. doi: 10.3390/v15122444 (PMC10747006; doi:10.3390/v15122444)
Supplement: Supplementary file 1 [file viruses-15-02444-s001.zip › Table_S1.xlsx]

## Sheet: Tabelle1
Primername	Sequence
NS1_IDV_Seg_PCR Fw	5`-CGG GTT ATT AGC AGT AGC AAG GGG TTT TTT C-3`
NS1_IDV_Seg_PCR Rv	5`-GGG GGA GCA TAA GCA GGG GTG TAC AAT TTC AAT-3`
pHW2000_LF_IVD1_a	5`-GCT TAT GCT CCC CCC CAA CTT CG-3`
pHW2000_RF_IVD_s	5`-ACT GCT AAT AAC CCG GCG GCC CAA AAT G-3`
BGH-rev	5`-TAG AAG GCA CAG TCG AGG-3`
CMV-for	5`-CGC AAA TGG GCG GTA GGC GTG-3`
