# Supplementary material for: Generation and Characterization of an Influenza D Reporter Virus
Source: Viruses. 2023 Dec 16;15(12):2444. doi: 10.3390/v15122444 (PMC10747006; doi:10.3390/v15122444)
Supplement: Supplementary file 1 [file viruses-15-02444-s001.zip › Table_S2.xlsx]

## Sheet: Sheet1
STRUCTURE	ENTITY_ID	TRIVIAL_NAME	CAS N°	SMILES	CHEM_NAME	FORMULA	MW	Indication	Litterature
License Error_x000D_ SciTegic06082004062D_x000D_ _x000D_ 21 22 0 0 0 0 999 V2000_x000D_ 7.8579 -5.0000 0.0000 O 0 0_x000D_ 7.1434 -5.4125 0.0000 C 0 0_x000D_ 6.4289 -5.0000 0.0000 C 0 0_x000D_ 5.7145 -5.4125 0.0000 C 0 0_x000D_ 5.7145 -6.2375 0.0000 C 0 0_x000D_ 5.0000 -6.6500 0.0000 Cl 0 0_x000D_ 6.4289 -6.6500 0.0000 C 0 0_x000D_ 7.1434 -6.2375 0.0000 C 0 0_x000D_ 7.8579 -6.6500 0.0000 C 0 0_x0…	MMV003461	Niclosamide	50-65-7	Oc1ccc(Cl)cc1C(=O)Nc2ccc(cc2Cl)[N+](=O)[O-]	5-chloro-N-(2-chloro-4-nitrophenyl)-2-hydroxybenzamide	C13 H8 Cl2 N2 O4	327.123	Anti-infective agent - Antiparasitic	doi.org/10.1101/2020.03.20.999730
(2E)-3-[2,6-Dichloro-4-[[[4-[3-[(1S)-1-(hexyloxy)ethyl]-2-methoxyphenyl]-2-th... ELEMENTL06082010482D 1110766-97-6 Copyright (C) 2020 ACS 39 41 0 0 1 0 999 V2000 34044.9940 2440.4052 0.0000 O 0 0 0 0 0 0 0 0 0 0 0 0 38255.3635 0.0000 0.0000 C 0 0 0 0 0 0 0 0 0 0 0 0 25262.2169 7508.9392 0.0000 C 0 0 0 0 0 0 0 0 0 0 0 0 25262.2169 2641.5375 0.0000 O 0 0 0 0 0 0 0 0 0 0 0 0 21051.8474 9935.9356 0.0…	MMV1804192	Lusutrombopag	1110766-97-6	O(c1c(cccc1c2csc(n2)NC(c3cc(c(c(c3)Cl)\C=C(/C)\C(=O)O)Cl)=O)[C@H](C)OCCCCCC)C	(E)-3-[2,6-dichloro-4-[[4-[3-[(1S)-1-hexoxyethyl]-2-methoxyphenyl]-1,3-thiazol-2-yl]carbamoyl]phenyl]-2-methylprop-2-enoic acid	C29 H32 Cl2 N2 O5 S	591.546	Pharmaceutical immune agent - Thrombocytopenia	doi.org/10.1101/2020.03.20.999730
BGB 324 ELEMENTL06082010472D 1037624-75-1 Copyright (C) 2020 ACS 39 45 0 0 1 0 999 V2000 22615.071638289.8129 0.0000 N 0 0 0 0 0 0 0 0 0 0 0 0 45499.795535537.8251 0.0000 N 0 0 0 0 0 0 0 0 0 0 0 0 16460.668114713.0139 0.0000 C 0 0 0 0 0 0 0 0 0 0 0 0 11341.308110630.4627 0.0000 C 0 0 0 0 0 0 0 0 0 0 0 0 22844.405613255.9671 0.0000 C 0 0 0 0 0 0 0 0 0 0 0 0 14530.639120970.0183 0.0000 N 0 0 0 0 0 …	MMV1804190	Bemcentinib	1037624-75-1	Nc(nc(n1)Nc2ccc(CC[C@]([H])(N3CCCC3)CC4)c4c2)n1c(nn5)cc(CCCc(cccc6)c67)c57	1-(3,4-diazatricyclo[9.4.0.02,7]pentadeca-1(15),2,4,6,11,13-hexaen-5-yl)-3-N-[(7S)-7-pyrrolidin-1-yl-6,7,8,9-tetrahydro-5H-benzo[7]annulen-3-yl]-1,2,4-triazole-3,5-diamine	C30 H34 N8	506.645	Antitumor agent	https://www.bergenbio.com/pipeline/bemcentinib-covid-19/
(βS)-β-[(Cycloheptylcarbonyl)amino]tetrahydro-α-oxo-2H-pyran-4-propanoic acid... ELEMENTL06082010432D 868273-90-9 Copyright (C) 2020 ACS 30 32 0 0 1 0 999 V2000 36650.385616817.2470 0.0000 C 0 0 0 0 0 0 0 0 0 0 0 0 29961.527512955.4324 0.0000 N 0 0 0 0 0 0 0 0 0 0 0 0 43339.243712955.4324 0.0000 C 0 0 0 0 0 0 0 0 0 0 0 0 23272.669316817.2509 0.0000 C 0 0 0 0 0 0 0 0 0 0 0 0 50028.101916817.2470 0…	MMV1804177	ONO 5334	868273-90-9	[C@H](C1CCOCC1)(C(=O)C(=O)N\N=C(/SC[C@H]2C)\N2C)NC(C3CCCCCC3)=O	N-[(1S)-3-[(2E)-2-[(4R)-3,4-dimethyl-1,3-thiazolidin-2-ylidene]hydrazinyl]-1-(oxan-4-yl)-2,3-dioxopropyl]cycloheptanecarboxamide	C21 H34 N4 O4 S	438.584	Antiosteoporotic agent	doi.org/10.1101/2020.04.16.044016
_x000D_ ELEMENTL06082010412D_x000D_ Dotmatics Elemental_x000D_ 42 45 0 0 0 0 999 V2000_x000D_ 6.0325 -11.0056 0.0000 C 0 0 0 0 0 0 0 0 0 0 0 0_x000D_ 4.9539 -11.4870 0.0000 C 0 0 0 0 0 0 0 0 0 0 0 0_x000D_ 4.8315 -12.6617 0.0000 C 0 0 0 0 0 0 0 0 0 0 0 0_x000D_ 5.7877 -13.3551 0.0000 C 0 0 0 0 0 0 0 0 0 0 0 0_x000D_ 6.8662 -12.8737 0.0000 C 0 0 0 0 0 0 0 0 0 0 0 0_x000D_ 6.9887 -11.6989 0.0000 C …	MMV1803859	Remdesivir	1809249-37-3	c1ccccc1OP(N[C@H](C(OCC(CC)CC)=O)C)(=O)OC[C@H]2O[C@@](C#N)(c3ccc(c(N)ncn4)n34)[C@H](O)[C@@H]2O	2-ethylbutyl (2S)-2-[[[(2R,3S,4R,5R)-5-(4-aminopyrrolo[2,1-f][1,2,4]triazin-7-yl)-5-cyano-3,4-dihydroxyoxolan-2-yl]methoxy-phenoxyphosphoryl]amino]propanoate	C27 H35 N6 O8 P	602.576	Anti-infective agent - Antiviral agent	doi.org/10.1101/2020.03.20.999730
License Error_x000D_ SciTegic06082004062D_x000D_ _x000D_ 23 25 0 0 0 0 999 V2000_x000D_ 11.6000 -7.8579 0.0000 C 0 0_x000D_ 11.1875 -7.1435 0.0000 C 0 0_x000D_ 10.3625 -7.1435 0.0000 N 0 0_x000D_ 9.9500 -6.4290 0.0000 C 0 0_x000D_ 9.1250 -6.4290 0.0000 C 0 0_x000D_ 8.7125 -7.1435 0.0000 C 0 0_x000D_ 7.8875 -7.1435 0.0000 C 0 0_x000D_ 7.4750 -7.8579 0.0000 N 0 0_x000D_ 6.6500 -7.8579 0.0000 C 0 0_…	MMV659065	N-Desethylamodiaquine	79352-78-6	CCNCc1cc(Nc2ccnc3cc(Cl)ccc23)ccc1O	4-[(7-chloroquinolin-4-yl)amino]-2-(ethylaminomethyl)phenol	C18 H18 Cl N3 O	327.815	Anti-infective agent - Antimalarial
License Error_x000D_ SciTegic06082004062D_x000D_ _x000D_ 45 50 0 0 1 0 999 V2000_x000D_ 8.3896 1.7559 0.0000 C 0 0_x000D_ 7.5672 1.6684 0.0000 C 0 0_x000D_ 7.0802 2.3368 0.0000 C 0 0_x000D_ 7.2318 0.9125 0.0000 C 0 0_x000D_ 7.7188 0.2440 0.0000 O 0 0_x000D_ 6.4094 0.8250 0.0000 O 0 0_x000D_ 6.0740 0.0690 0.0000 C 0 0_x000D_ 5.2517 -0.0185 0.0000 C 0 0_x000D_ 4.9400 0.4093 0.0000 O 0 0_x000D_ 4.91…	MMV1580187	Ciclesonide	126544-47-6	O=C(OCC([C@]1([C@]2(C)[C@H]([C@H]3[C@@H]([C@](C)(C(=C4)CC3)C=CC4=O)[C@@H](O)C2)C5)[C@@H]5OC(C6CCCCC6)O1)=O)C(C)C	[2-[(1S,2S,4R,6R,8S,11R,12S)-6-cyclohexyl-11-hydroxy-9,13-dimethyl-16-oxo-5,7-dioxapentacyclo[10.8.0.02,9.04,8.013,18]icosa-14,17-dien-8-yl]-2-oxoethyl] 2-methylpropanoate	C32 H44 O7	540.688	Respiratory system agent - Antiasthmatics	doi.org/10.1101/2020.03.20.999730
License Error_x000D_ SciTegic06082004062D_x000D_ _x000D_ 42 45 0 0 1 0 999 V2000_x000D_ -4.1316 0.0010 0.0000 C 0 0_x000D_ -5.6324 0.0032 0.0000 N 0 0_x000D_ -3.3838 -1.2994 0.0000 O 0 0_x000D_ -3.3785 1.2993 0.0000 C 0 0 1 0 0 0_x000D_ -6.3855 -1.2951 0.0000 C 0 0_x000D_ -1.8785 1.2993 0.0000 N 0 0_x000D_ -4.1285 2.5983 0.0000 C 0 0_x000D_ -7.8855 -1.2930 0.0000 C 0 0_x000D_ -7.1375 -2.5930 0.00…	MMV637677	Nelfinavir	159989-64-7	Cc1c(O)cccc1C(=O)N[C@@H](CSc2ccccc2)[C@H](O)CN3C[C@H]4CCCC[C@H]4C[C@H]3C(=O)NC(C)(C)C	(3S,4aS,8aS)-N-tert-butyl-2-[(2R,3R)-2-hydroxy-3-[(3-hydroxy-2-methylbenzoyl)amino]-4-phenylsulfanylbutyl]-3,4,4a,5,6,7,8,8a-octahydro-1H-isoquinoline-3-carboxamide	C32 H45 N3 O4 S	567.782	Anti-infective agent - Anti-HIV agent	www.medrxiv.org/content/10.1101/2020.04.16.20068379v1.full.pdf
License Error_x000D_ SciTegic06082004062D_x000D_ _x000D_ 29 31 0 0 0 0 999 V2000_x000D_ 11.6000 -5.7145 0.0000 C 0 0_x000D_ 11.1875 -6.4290 0.0000 C 0 0_x000D_ 10.3625 -6.4290 0.0000 O 0 0_x000D_ 9.9500 -7.1434 0.0000 C 0 0_x000D_ 10.3625 -7.8579 0.0000 C 0 0_x000D_ 9.9500 -8.5724 0.0000 C 0 0_x000D_ 9.1250 -8.5724 0.0000 C 0 0_x000D_ 8.7125 -9.2868 0.0000 C 0 0_x000D_ 7.8875 -9.2868 0.0000 C 0 0…	MMV003140	Ethaverine	486-47-5	CCOc1ccc(Cc2nccc3cc(OCC)c(OCC)cc23)cc1OCC	1-[(3,4-diethoxyphenyl)methyl]-6,7-diethoxyisoquinoline	C24 H29 N O4	395.499	Cardiovascular agent - Coronary vasodilator	doi.org/10.21203/rs.3.rs-23951/v1
License Error_x000D_ SciTegic06082004062D_x000D_ _x000D_ 50 53 0 0 1 0 999 V2000_x000D_ 2.5951 3.7974 0.0000 C 0 0 1 0 0 0_x000D_ 2.5973 5.2982 0.0000 C 0 0_x000D_ 3.8925 3.0429 0.0000 C 0 0_x000D_ 1.2925 3.0519 0.0000 N 0 0_x000D_ 1.2990 6.0513 0.0000 C 0 0_x000D_ 5.1951 3.7883 0.0000 C 0 0 1 0 0 0_x000D_ 1.2859 1.5511 0.0000 C 0 0_x000D_ 1.2990 7.5513 0.0000 C 0 0_x000D_ 0.0000 5.3013 0.0000 C …	MMV637861	Ritonavir	155213-67-5	CC(C)[C@H](NC(=O)N(C)Cc1csc(n1)C(C)C)C(=O)N[C@H](C[C@H](O)[C@H](Cc2ccccc2)NC(=O)OCc3cncs3)Cc4ccccc4	1,3-thiazol-5-ylmethyl N-[(2S,3S,5S)-3-hydroxy-5-[[(2S)-3-methyl-2-[[methyl-[(2-propan-2-yl-1,3-thiazol-4-yl)methyl]carbamoyl]amino]butanoyl]amino]-1,6-diphenylhexan-2-yl]carbamate	C37 H48 N6 O5 S2	720.944	Anti-infective agent - Anti-HIV agent	doi.org/10.1016/j.phrs.2020.104859
License Error_x000D_ SciTegic06082004062D_x000D_ _x000D_ 21 23 0 0 0 0 999 V2000_x000D_ 5.0002 1.2376 0.0000 C 0 0_x000D_ 5.7147 1.6501 0.0000 N 0 0_x000D_ 5.7147 2.4751 0.0000 C 0 0_x000D_ 6.4291 1.2375 0.0000 C 0 0_x000D_ 6.4291 0.4125 0.0000 C 0 0_x000D_ 7.1436 0.0000 0.0000 C 0 0_x000D_ 7.1435 -0.8250 0.0000 N 0 0_x000D_ 6.4291 -1.2375 0.0000 C 0 0_x000D_ 5.7145 -0.8250 0.0000 C 0 0_x000D_ 5.…	MMV001871	Chlorpromazine	50-53-3 69-09-0	CN(C)CCCN1c2ccccc2Sc3ccc(Cl)cc13	3-(2-chlorophenothiazin-10-yl)-N,N-dimethylpropan-1-amine	C17 H19 Cl N2 S	318.864	Antitumor agent	doi: 10.1016/j.encep.2020.04.010
Apilimod ELEMENTL06082010472D 541550-19-0 Copyright (C) 2020 ACS 31 34 0 0 0 0 999 V2000 45000.000012990.3815 0.0000 N 0 0 0 0 0 0 0 0 0 0 0 0 37500.000717320.5087 0.0000 N 0 0 0 0 0 0 0 0 0 0 0 0 29999.997112990.3815 0.0000 C 0 0 0 0 0 0 0 0 0 0 0 0 59999.998538971.1445 0.0000 O 0 0 0 0 0 0 0 0 0 0 0 0 67500.002243301.2717 0.0000 C 0 0 0 0 0 0 0 0 0 0 0 0 67500.002251961.5260 0.0000 C 0 0 0 0 0 …	MMV1804187	Apilimod	541550-19-0	N(c(nc(nc1N2CCOCC2)OCCc3ncccc3)c1)N=Cc4cccc(c4)C	N-[(3-methylphenyl)methylideneamino]-6-morpholin-4-yl-2-(2-pyridin-2-ylethoxy)pyrimidin-4-amine	C23 H26 N6 O2	418.492	Antitumor agent - B-cell non-Hodgkin's lymphoma	doi.org/10.1101/2020.04.16.044016
Regorafenib ELEMENTL06082010462D 755037-03-7 Copyright (C) 2020 ACS 33 35 0 0 0 0 999 V2000 58235.297418339.3620 0.0000 O 0 0 0 0 0 0 0 0 0 0 0 0 79411.765818339.3620 0.0000 C 0 0 0 0 0 0 0 0 0 0 0 0 84705.886015282.8017 0.0000 N 0 0 0 0 0 0 0 0 0 0 0 0 79411.765824452.4827 0.0000 O 0 0 0 0 0 0 0 0 0 0 0 0 90000.000018339.3589 0.0000 C 0 0 0 0 0 0 0 0 0 0 0 0 37058.822818339.3620 0.0000 F 0 0 0 0…	MMV1804185	Regorafenib	755037-03-7	O(c1ccc(c(c1)F)NC(=O)Nc2ccc(c(c2)C(F)(F)F)Cl)c3ccnc(c3)C(=O)NC	4-[4-[[4-chloro-3-(trifluoromethyl)phenyl]carbamoylamino]-3-fluorophenoxy]-N-methylpyridine-2-carboxamide	C21 H15 Cl F4 N4 O3	482.815	Antitumor agent	doi.org/10.21203/rs.3.rs-23951/v1
PLX 3397 ELEMENTL06082010442D 1029044-16-3 Copyright (C) 2020 ACS 29 32 0 0 0 0 999 V2000 26047.832612633.2158 0.0000 C 0 0 0 0 0 0 0 0 0 0 0 0 0.000017764.7594 0.0000 Cl 0 0 0 0 0 0 0 0 0 0 0 0 52463.2123 7018.4532 0.0000 N 0 0 0 0 0 0 0 0 0 0 0 0 56980.769312035.7053 0.0000 C 0 0 0 0 0 0 0 0 0 0 0 0 83396.1491 6420.9427 0.0000 C 0 0 0 0 0 0 0 0 0 0 0 0 85482.4396 0.0000 0.0000 F 0 0 0 0 0 0 0 0…	MMV1804178	Pexidartanib	1029044-16-3	C(c1cnc(cc1)NCc2cnc(cc2)C(F)(F)F)c3c[nH]c(ncc(c4)Cl)c34	5-[(5-chloro-1H-pyrrolo[2,3-b]pyridin-3-yl)methyl]-N-[[6-(trifluoromethyl)pyridin-3-yl]methyl]pyridin-2-amine	C20 H15 Cl F3 N5	417.815	Antitumor agent	doi.org/10.21203/rs.3.rs-23951/v1
License Error_x000D_ SciTegic06052009092D_x000D_ _x000D_ 36 40 0 0 0 0 999 V2000_x000D_ 5.4324 -0.9253 0.0000 C 0 0 1 0 0 0_x000D_ 4.6794 -2.2241 0.0000 C 0 0_x000D_ 3.9726 -0.8212 0.0000 O 0 0_x000D_ 6.9332 -0.9276 0.0000 C 0 0_x000D_ 6.0765 0.3888 0.0000 O 0 0_x000D_ 3.1794 -2.2241 0.0000 C 0 0_x000D_ 5.4294 -3.5231 0.0000 C 0 0_x000D_ 3.6632 0.6465 0.0000 C 0 0 2 0 0 0_x000D_ 7.6864 0.3706 0.0…	MMV637533	Ketoconazole	65277-42-1	CC(=O)N1CCN(CC1)c2ccc(OC[C@H]3CO[C@@](Cn4ccnc4)(O3)c5ccc(Cl)cc5Cl)cc2	1-[4-[4-[[rac-(2R,4S)-2-(2,4-dichlorophenyl)-2-(imidazol-1-ylmethyl)-1,3-dioxolan-4-yl]methoxy]phenyl]piperazin-1-yl]ethanone	C26 H28 Cl2 N4 O4	531.431	Anti-infective agent - Antifungal	doi.org/10.21203/rs.3.rs-23951/v1
License Error_x000D_ SciTegic06082004062D_x000D_ _x000D_ 29 31 0 0 0 0 999 V2000_x000D_ 10.3899 -2.6427 0.0000 C 0 0_x000D_ 9.0920 -1.8909 0.0000 C 0 0_x000D_ 7.7907 -2.6385 0.0000 O 0 0_x000D_ 6.4920 -1.8864 0.0000 C 0 0_x000D_ 6.4972 -0.3864 0.0000 C 0 0_x000D_ 5.2007 0.3682 0.0000 C 0 0_x000D_ 3.8990 -0.3772 0.0000 C 0 0_x000D_ 2.6003 0.3750 0.0000 C 0 0_x000D_ 1.2990 -0.3728 0.0000 C 0 0_x000…	MMV852425	Drotaverine	14009-24-6 985-12-6	CCOc1ccc(C=C2NCCc3cc(OCC)c(OCC)cc23)cc1OCC	1-[(3,4-diethoxyphenyl)methylidene]-6,7-diethoxy-3,4-dihydro-2H-isoquinoline	C24 H31 N O4	397.507	Nervous system agent - Antispasmodic	doi.org/10.21203/rs.3.rs-23951/v1
License Error_x000D_ SciTegic06082004062D_x000D_ _x000D_ 33 34 0 0 0 0 999 V2000_x000D_ 16.4316 -1.6500 0.0000 C 0 0_x000D_ 15.7171 -2.0625 0.0000 O 0 0_x000D_ 15.0026 -1.6500 0.0000 C 0 0_x000D_ 14.2881 -2.0625 0.0000 C 0 0_x000D_ 13.5737 -1.6500 0.0000 C 0 0_x000D_ 13.5737 -0.8250 0.0000 C 0 0_x000D_ 12.8592 -0.4125 0.0000 C 0 0_x000D_ 12.1447 -0.8250 0.0000 C 0 0_x000D_ 11.4303 -0.4125 0.0000 …	MMV002398	Verapamil	52-53-9 152-11-4	COc1ccc(CCN(C)CCCC(C#N)(C(C)C)c2ccc(OC)c(OC)c2)cc1OC	2-(3,4-dimethoxyphenyl)-5-[2-(3,4-dimethoxyphenyl)ethyl-methylamino]-2-propan-2-ylpentanenitrile	C27 H38 N2 O4	454.602	Cardiovascular agent - Antihypertensive	doi.org/10.1016/j.apsb.2020.02.008
[(4S,5R)-4,5-Bis(4-chlorophenyl)-2-[4-(1,1-dimethylethyl)-2-ethoxyphenyl]-4,5... ELEMENTL06082010482D 939981-39-2 Copyright (C) 2020 ACS 49 53 0 0 1 0 999 V2000 38579.521826720.8002 0.0000 C 0 0 0 0 0 0 0 0 0 0 0 0 38523.099639369.9700 0.0000 C 0 0 0 0 0 0 0 0 0 0 0 0 38523.099646800.0210 0.0000 O 0 0 0 0 0 0 0 0 0 0 0 0 24820.798819331.4503 0.0000 C 0 0 0 0 0 0 0 0 0 0 0 0 11168.000743269.0424 0…	MMV1804226	R 7112	939981-39-2	C[C@@]1(c2ccc(cc2)Cl)[C@](c3ccc(cc3)Cl)(N=C(c4ccc(cc4OCC)C(C)(C)C)N1C(N5CCN(CC5)CCCS(=O)(=O)C)=O)C	[(4S,5R)-2-(4-tert-butyl-2-ethoxyphenyl)-4,5-bis(4-chlorophenyl)-4,5-dimethylimidazol-1-yl]-[4-(3-methylsulfonylpropyl)piperazin-1-yl]methanone	C38 H48 Cl2 N4 O4 S	727.783	Antitumor agent
License Error_x000D_ SciTegic06082004062D_x000D_ _x000D_ 51 53 0 0 1 0 999 V2000_x000D_ 2.5951 -0.7510 0.0000 N 0 0_x000D_ 2.5973 0.7498 0.0000 C 0 0_x000D_ 3.8952 -0.0029 0.0000 C 0 0_x000D_ 1.2951 -1.4991 0.0000 N 0 0_x000D_ 5.1944 -0.7544 0.0000 C 0 0 1 0 0 0_x000D_ 1.2919 -3.0000 0.0000 C 0 0_x000D_ 6.4952 -0.0058 0.0000 C 0 0 2 0 0 0_x000D_ 5.1927 -2.2544 0.0000 O 0 0_x000D_ -0.0089 -3.7485 …	MMV659028	Atazanavir	198904-31-3	COC(=O)N[C@H](C(=O)N[C@@H](Cc1ccccc1)[C@@H](O)CN(Cc2ccc(cc2)c3ccccn3)NC(=O)[C@@H](NC(=O)OC)C(C)(C)C)C(C)(C)C	methyl N-[(2S)-1-[2-[(2S,3S)-2-hydroxy-3-[[(2S)-2-(methoxycarbonylamino)-3,3-dimethylbutanoyl]amino]-4-phenylbutyl]-2-[(4-pyridin-2-ylphenyl)methyl]hydrazinyl]-3,3-dimethyl-1-oxobutan-2-yl]carbamate	C38 H52 N6 O7	704.855	Anti-infective agent - Anti-HIV agent	doi.org/10.1101/2020.04.04.020925.
Ruxolitinib ELEMENTL06082010442D 941678-49-5 Copyright (C) 2020 ACS 23 26 0 0 1 0 999 V2000 33323.773415614.6837 0.0000 C 0 0 0 0 0 0 0 0 0 0 0 0 27666.3311 2907.8513 0.0000 C 0 0 0 0 0 0 0 0 0 0 0 0 13833.1620 1453.9292 0.0000 C 0 0 0 0 0 0 0 0 0 0 0 0 0.0000 0.0000 0.0000 N 0 0 0 0 0 0 0 0 0 0 0 0 18193.379062181.2664 0.0000 C 0 0 0 0 0 0 0 0 0 0 0 0 30239.239369135.9480 0.0000 C 0 0 0 0 0 0 0 …	MMV1804179	Ruxolitinib	941678-49-5	[C@@H](C1CCCC1)(n(ncc2c3ncnc([nH]cc4)c34)c2)CC#N	(3R)-3-cyclopentyl-3-[4-(7H-pyrrolo[2,3-d]pyrimidin-4-yl)pyrazol-1-yl]propanenitrile	C17 H18 N6	306.365	Pharmaceutical immune agent - Thrombocytopenia	doi.org/10.1101/2020.03.20.999730 doi.org/10.1016/S1473-3099(20)30132-8
License Error_x000D_ SciTegic06082004062D_x000D_ _x000D_ 25 27 0 0 0 0 999 V2000_x000D_ -1.2990 1.4913 0.0000 C 0 0_x000D_ -1.2990 2.9913 0.0000 N 0 0_x000D_ 0.0000 3.7413 0.0000 C 0 0_x000D_ 1.2990 2.9913 0.0000 C 0 0_x000D_ 1.2990 1.4913 0.0000 C 0 0_x000D_ 2.5981 0.7413 0.0000 C 0 0_x000D_ 2.5981 -0.7588 0.0000 C 0 0_x000D_ 1.2990 -1.5087 0.0000 C 0 0_x000D_ 0.0000 -0.7588 0.0000 C 0 0_x000D_ …	MMV002798	Papaverine	58-74-2 61-25-6	COc1ccc(Cc2nccc3cc(OC)c(OC)cc23)cc1OC	1-[(3,4-dimethoxyphenyl)methyl]-6,7-dimethoxyisoquinoline	C20 H21 N O4	339.385	Nervous system agent - Antispasmodic	doi.org/10.21203/rs.3.rs-23951/v1
License Error_x000D_ SciTegic06052009092D_x000D_ _x000D_ 25 27 0 0 0 0 999 V2000_x000D_ 5.7131 -6.2483 0.0000 C 0 0_x000D_ 5.7131 -5.4189 0.0000 C 0 0_x000D_ 6.4289 -5.0000 0.0000 C 0 0_x000D_ 7.1446 -5.4189 0.0000 C 0 0_x000D_ 7.1411 -6.2483 0.0000 C 0 0_x000D_ 6.4289 -6.6587 0.0000 C 0 0_x000D_ 7.8607 -5.0050 0.0000 N 0 0_x000D_ 8.5777 -5.4251 0.0000 C 0 0_x000D_ 8.5742 -6.2543 0.0000 C 0 0_x00…	MMV000029	GSK-369796	1010411-21-8 459133-38-1	CC(C)(C)NCc1ccc(Nc2ccnc3cc(Cl)ccc23)cc1O	2-[(tert-butylamino)methyl]-5-[(7-chloroquinolin-4-yl)amino]phenol	C20 H22 Cl N3 O	355.869	Anti-infective agent - Antimalarial	doi.org/10.1101/2020.04.16.044016
Daclatasvir ELEMENTL06082010462D 1009119-64-5 Copyright (C) 2020 ACS 54 59 0 0 1 0 999 V2000 15642.133713223.4976 0.0000 C 0 0 0 0 0 0 0 0 0 0 0 0 11825.793411023.6327 0.0000 C 0 0 0 0 0 0 0 0 0 0 0 0 19458.474011023.6327 0.0000 O 0 0 0 0 0 0 0 0 0 0 0 0 11825.7934 6611.7488 0.0000 N 0 0 0 0 0 0 0 0 0 0 0 0 8009.453113223.4976 0.0000 C 0 0 0 0 0 0 0 0 0 0 0 0 8009.4531 4411.8839 0.0000 C 0 0 0 0 …	MMV1804186	Daclatasvir	1009119-64-5	C(N1CCC[C@H]1c2ncc(c3ccc(c4ccc(c5cnc([C@@H]6CCCN6C(=O)[C@H](C(C)C)NC(=O)OC)[nH]5)cc4)cc3)[nH]2)(=O)[C@H](C(C)C)NC(=O)OC	methyl N-[(2S)-1-[(2S)-2-[4-[4-[4-[2-[(2S)-1-[(2S)-2-(methoxycarbonylamino)-3-methylbutanoyl]pyrrolidin-2-yl]-1H-imidazol-4-yl]phenyl]phenyl]-1H-imidazol-2-yl]pyrrolidin-1-yl]-3-methyl-1-oxobutan-2-yl]carbamate	C40 H50 N8 O6	738.875	Anti-infective agent - Antiviral agent	en.irct.ir/trial/46463
License Error_x000D_ SciTegic06082004062D_x000D_ _x000D_ 37 41 0 0 1 0 999 V2000_x000D_ 3.8084 -1.2907 0.0000 Br 0 0_x000D_ 0.9931 -4.0875 0.0000 Cl 0 0_x000D_ -1.5211 6.9350 0.0000 Br 0 0_x000D_ 6.9169 -1.0369 0.0000 C 0 0_x000D_ 6.9443 -2.5375 0.0000 C 0 0_x000D_ 8.2022 -0.2637 0.0000 O 0 0_x000D_ 12.2001 -5.4354 0.0000 C 0 0_x000D_ 12.2322 -6.9350 0.0000 N 0 0_x000D_ 13.4830 -4.6581 0.0000 O 0…	MMV658920	Lonafarnib	193275-84-2	NC(=O)N1CCC(CC(=O)N2CCC(CC2)[C@H]3c4ncc(Br)cc4CCc5cc(Cl)cc(Br)c35)CC1	4-[2-[4-[(2R)-6,15-dibromo-13-chloro-4-azatricyclo[9.4.0.03,8]pentadeca-1(15),3,5,7,11,13-hexaen-2-yl]piperidin-1-yl]-2-oxoethyl]piperidine-1-carboxamide	C27 H31 Br2 Cl N4 O2	638.822	Genetic disorders agent - HGP syndrome	doi.org/10.21203/rs.3.rs-23951/v1
License Error_x000D_ SciTegic06052009092D_x000D_ _x000D_ 49 55 0 0 0 0 999 V2000_x000D_ -8.7975 4.3989 0.0000 C 0 0_x000D_ -8.0445 5.6977 0.0000 C 0 0_x000D_ -7.3377 4.2948 0.0000 O 0 0_x000D_ -10.2983 4.4012 0.0000 C 0 0_x000D_ -9.4416 3.0848 0.0000 O 0 0_x000D_ -6.5445 5.6977 0.0000 C 0 0_x000D_ -8.7945 6.9967 0.0000 C 0 0_x000D_ -7.0283 2.8271 0.0000 C 0 0_x000D_ -11.0515 3.1030 0.0000 N 0 0_x…	MMV637528	Itraconazole	84625-61-6	CCC(C)N1N=CN(C1=O)c2ccc(cc2)N3CCN(CC3)c4ccc(OCC5COC(Cn6cncn6)(O5)c7ccc(Cl)cc7Cl)cc4	2-butan-2-yl-4-[4-[4-[4-[[2-(2,4-dichlorophenyl)-2-(1,2,4-triazol-1-ylmethyl)-1,3-dioxolan-4-yl]methoxy]phenyl]piperazin-1-yl]phenyl]-1,2,4-triazol-3-one	C35 H38 Cl2 N8 O4	705.633	Anti-infective agent - Antifungal	clinicaltrialsregister.eu/ctr-search/trial/2020-001243-15/BE
License Error_x000D_ SciTegic06082004062D_x000D_ _x000D_ 23 26 0 0 0 0 999 V2000_x000D_ 19.0204 -0.3288 0.0000 Cl 0 0_x000D_ 18.0696 -0.0190 0.0000 C 0 0_x000D_ 17.3259 -0.6874 0.0000 C 0 0_x000D_ 16.3752 -0.3778 0.0000 C 0 0_x000D_ 16.1680 0.6006 0.0000 C 0 0_x000D_ 15.1735 0.7060 0.0000 N 0 0_x000D_ 14.7659 -0.2072 0.0000 C 0 0_x000D_ 15.5085 -0.8771 0.0000 C 0 0_x000D_ 15.2999 -1.8550 0.0000 C…	MMV690621	GSK 983	827591-02-6	Clc1ccc2[nH]c3C(CCCc3c2c1)NC(=O)c4ccccn4	N-(6-chloro-2,3,4,9-tetrahydro-1H-carbazol-1-yl)pyridine-2-carboxamide	C18 H16 Cl N3 O	325.792	Anti-infective agent - Antiviral agent	doi.org/10.1016/j.chembiol.2020.05.002
License Error_x000D_ SciTegic06082004062D_x000D_ _x000D_ 11 12 0 0 0 0 999 V2000_x000D_ 5.7167 -7.7225 0.0000 N 0 0_x000D_ 6.4311 -7.3100 0.0000 C 0 0_x000D_ 7.1456 -7.7225 0.0000 N 0 0_x000D_ 7.8600 -7.3100 0.0000 C 0 0_x000D_ 8.6447 -7.5649 0.0000 N 0 0_x000D_ 9.1296 -6.8975 0.0000 C 0 0_x000D_ 8.6447 -6.2301 0.0000 N 0 0_x000D_ 7.8600 -6.4850 0.0000 C 0 0_x000D_ 7.1456 -6.0725 0.0000 C 0 0_x00…	MMV662539	Tioguanine	154-42-7	Nc1nc(S)c2[nH]cnc2n1	2-amino-7H-purine-6-thiol	C5 H5 N5 S	167.194	Antitumor agent - Leukemia	doi.org/10.21203/rs.3.rs-23951/v1
6′-[(6-Amino-4-pyrimidinyl)amino]-8′-methylspiro[cyclohexane-1,3′(2′H)-imidaz... ELEMENTL06082010512D 1849590-01-7 Copyright (C) 2020 ACS 25 28 0 0 0 0 999 V2000 56341.1127 7710.6751 0.0000 O 0 0 0 0 0 0 0 0 0 0 0 0 79394.086748480.6016 0.0000 O 0 0 0 0 0 0 0 0 0 0 0 0 56341.112751082.0909 0.0000 C 0 0 0 0 0 0 0 0 0 0 0 0 37560.738118553.5277 0.0000 N 0 0 0 0 0 0 0 0 0 0 0 0 0.000018553.5277 0.00…	MMV1804184	Tomivosertib	1849590-01-7	O=C1C(=CC(=C(C(NC23CCCCC2)=O)N13)C)Nc4ncnc(c4)N	6-[(6-aminopyrimidin-4-yl)amino]-8-methylspiro[2H-imidazo[1,5-a]pyridine-3,1'-cyclohexane]-1,5-dione	C17 H20 N6 O2	340.38	Antitumor agent	doi.org/10.1016/j.bbi.2020.05.078
License Error_x000D_ SciTegic06082004062D_x000D_ _x000D_ 31 34 0 0 0 0 999 V2000_x000D_ 4.4536 -3.6500 0.0000 F 0 0_x000D_ 3.0139 -3.2287 0.0000 C 0 0_x000D_ 2.6589 -1.7715 0.0000 C 0 0_x000D_ 1.2191 -1.3503 0.0000 C 0 0_x000D_ 0.1391 -2.3836 0.0000 C 0 0_x000D_ 0.4898 -3.8440 0.0000 C 0 0_x000D_ 1.9295 -4.2650 0.0000 C 0 0_x000D_ -1.3302 -2.0779 0.0000 C 0 0_x000D_ -2.4465 -3.0800 0.0000 N 0 0_x…	MMV690777	LY 2228820	862505-00-8	CC(C)(C)Cn1c(N)nc2ccc(nc12)c3[nH]c(nc3c4ccc(F)cc4)C(C)(C)C	5-[2-tert-butyl-4-(4-fluorophenyl)-1H-imidazol-5-yl]-3-(2,2-dimethylpropyl)imidazo[4,5-b]pyridin-2-amine	C24 H29 F N6	420.526	Antitumor agent	doi.org/10.1101/2020.05.12.091256
Tigecycline ELEMENTL06082010442D 220620-09-7 Copyright (C) 2020 ACS 44 47 0 0 1 0 999 V2000 67499.996725980.7617 0.0000 O 0 0 0 0 0 0 0 0 0 0 0 0 73124.9926 3247.5952 0.0000 N 0 0 0 0 0 0 0 0 0 0 0 0 67499.9967 0.0000 0.0000 C 0 0 0 0 0 0 0 0 0 0 0 0 78749.9950 0.0000 0.0000 C 0 0 0 0 0 0 0 0 0 0 0 0 61875.000829228.3570 0.0000 O 0 0 0 0 0 0 0 0 0 0 0 0 73124.992629228.3570 0.0000 O 0 0 0 0 0 0 0…	MMV1804180	Tigecycline	220620-09-7	O[C@](C(C(=C([C@H]1N(C)C)O)C(=O)N)=O)(C(=C(C(c(c(c(cc2N(C)C)NC(=O)CNC(C)(C)C)O)c2C3)=O)[C@]3([H])C4)O)[C@]14[H]	(4S,4aS,5aR,12aR)-9-[[2-(tert-butylamino)acetyl]amino]-4,7-bis(dimethylamino)-1,10,11,12a-tetrahydroxy-3,12-dioxo-4a,5,5a,6-tetrahydro-4H-tetracene-2-carboxamide	C29 H39 N5 O8	585.649	Anti-infective agent - Antibacterial	doi.org/10.1016/j.apsb.2020.02.008
License Error_x000D_ SciTegic06082004062D_x000D_ _x000D_ 59 66 0 0 1 0 999 V2000_x000D_ 71016.8480-5419.9696 0.0000 O 0 0_x000D_ 71493.0487 8222.2710 0.0000 C 0 0_x000D_ 67071.465710525.0956 0.0000 O 0 0_x000D_ 59180.7059 1413.6298 0.0000 C 0 0_x000D_ 90000.000011622.0696 0.0000 O 0 0_x000D_ 47344.5638-9975.7026 0.0000 O 0 0_x000D_ 39453.8039 3691.4962 0.0000 O 0 0_x000D_ 31563.0417-9975.7026 0.0…	MMV002832	Digoxin	20830-75-5	C[C@H]1O[C@H](C[C@H](O)[C@@H]1O)O[C@H]2[C@@H](O)C[C@H](O[C@H]3[C@@H](O)C[C@H](O[C@H]4CC[C@@]5(C)[C@H](CC[C@@H]6[C@@H]5C[C@@H](O)[C@]7(C)[C@H](CC[C@]67O)C8=CC(=O)OC8)C4)O[C@@H]3C)O[C@@H]2C	3-[(3S,5R,8R,9S,10S,12R,13S,14S,17R)-3-[(2R,4S,5S,6R)-5-[(2S,4S,5S,6R)-5-[(2S,4S,5S,6R)-4,5-dihydroxy-6-methyloxan-2-yl]oxy-4-hydroxy-6-methyloxan-2-yl]oxy-4-hydroxy-6-methyloxan-2-yl]oxy-12,14-dihydroxy-10,13-dimethyl-1,2,3,4,5,6,7,8,9,11,12,15,16,17-tetradecahydrocyclopenta[a]phenanthren-17-yl]-2H-furan-5-one	C41 H64 O14	780.938	Cardiovascular agent - Antiarrhythmic	doi.org/10.1101/2020.03.20.999730
License Error_x000D_ SciTegic06082004062D_x000D_ _x000D_ 25 27 0 0 0 0 999 V2000_x000D_ 5.7129 -0.8239 0.0000 C 0 0_x000D_ 5.7129 -1.6500 0.0000 C 0 0_x000D_ 6.4283 -2.0630 0.0000 C 0 0_x000D_ 7.1437 -1.6500 0.0000 C 0 0_x000D_ 7.1437 -0.8239 0.0000 C 0 0_x000D_ 6.4283 -0.4109 0.0000 C 0 0_x000D_ 7.8591 -2.0630 0.0000 N 0 0_x000D_ 8.5745 -1.6500 0.0000 C 0 0_x000D_ 8.5745 -0.8239 0.0000 C 0 0_x00…	MMV000001	Amodiaquine	69-44-3 86-42-0	CCN(CC)Cc1cc(Nc2ccnc3cc(Cl)ccc23)ccc1O	4-[(7-chloroquinolin-4-yl)amino]-2-(diethylaminomethyl)phenol	C20 H22 Cl N3 O	355.861	Anti-infective agent - Antimalarial	doi.org/10.1101/2020.03.20.999730
License Error_x000D_ SciTegic06082004062D_x000D_ _x000D_ 34 38 0 0 0 0 999 V2000_x000D_ 5.0000 -2.5003 0.0000 C 0 0_x000D_ 5.7145 -2.9128 0.0000 O 0 0_x000D_ 6.4290 -2.5003 0.0000 C 0 0_x000D_ 6.4289 -1.6753 0.0000 C 0 0_x000D_ 7.1434 -1.2628 0.0000 C 0 0_x000D_ 7.8579 -1.6753 0.0000 C 0 0_x000D_ 8.5723 -1.2628 0.0000 C 0 0_x000D_ 9.2868 -1.6753 0.0000 C 0 0_x000D_ 10.0013 -1.2628 0.0000 N 0 0_x0…	MMV003162	Astemizole	68844-77-9	COc1ccc(CCN2CCC(CC2)Nc3nc4ccccc4n3Cc5ccc(F)cc5)cc1	1-[(4-fluorophenyl)methyl]-N-[1-[2-(4-methoxyphenyl)ethyl]piperidin-4-yl]benzimidazol-2-amine	C28 H31 F N4 O	458.57	Pharmaceutical immune agent - Antihystaminic	doi.org/10.1101/2020.04.16.044016
License Error_x000D_ SciTegic06082004062D_x000D_ _x000D_ 33 35 0 0 0 0 999 V2000_x000D_ 5.7151 -2.4909 0.0000 C 0 0_x000D_ 6.1244 -3.2088 0.0000 C 0 0_x000D_ 6.9525 -3.2151 0.0000 C 0 0_x000D_ 7.3650 -2.5017 0.0000 C 0 0_x000D_ 6.9558 -1.7837 0.0000 C 0 0_x000D_ 6.1341 -1.7793 0.0000 C 0 0_x000D_ 8.1969 -2.5105 0.0000 C 0 0_x000D_ 8.6148 -1.7913 0.0000 C 0 0_x000D_ 8.2040 -1.0672 0.0000 C 0 0_x00…	MMV000012	Halofantrine	36167-63-2 69756-53-2	CCCCN(CCCC)CCC(O)c1cc2c(Cl)cc(Cl)cc2c3cc(ccc13)C(F)(F)F	3-(dibutylamino)-1-[1,3-dichloro-6-(trifluoromethyl)phenanthren-9-yl]propan-1-ol	C26 H30 Cl2 F3 N O	500.424	Anti-infective agent - Antimalarial	doi.org/10.36877/pddbs.a0000065
License Error_x000D_ SciTegic06052009092D_x000D_ _x000D_ 31 34 0 0 1 0 999 V2000_x000D_ -0.6550 3.5056 0.0000 C 0 0_x000D_ -0.6550 2.8440 0.0000 C 0 0 1 0 0 0_x000D_ 0.1720 2.8440 0.0000 C 0 0_x000D_ 0.6581 2.1749 0.0000 N 0 0_x000D_ 1.4447 2.4305 0.0000 C 0 0_x000D_ 2.1137 1.9444 0.0000 C 0 0_x000D_ 2.8692 2.2808 0.0000 C 0 0_x000D_ 3.5383 1.7947 0.0000 C 0 0_x000D_ 3.4518 0.9722 0.0000 C 0 0_x0…	MMV1634362	Ravuconazole	182760-06-1	C[C@@H](c1nc(cs1)c2ccc(cc2)C#N)[C@](O)(Cn3cncn3)c4ccc(F)cc4F	4-[2-[(2R,3R)-3-(2,4-difluorophenyl)-3-hydroxy-4-(1,2,4-triazol-1-yl)butan-2-yl]-1,3-thiazol-4-yl]benzonitrile	C22 H17 F2 N5 O S	437.465	Anti-infective agent - Antifungal	doi.org/10.21203/rs.3.rs-23951/v1
Tizoxanide ELEMENTL06082010452D 173903-47-4 Copyright (C) 2020 ACS 18 19 0 0 0 0 999 V2000 31197.250724015.6580 0.0000 C 0 0 0 0 0 0 0 0 0 0 0 0 41596.334318011.7435 0.0000 N 0 0 0 0 0 0 0 0 0 0 0 0 31197.250736023.4870 0.0000 O 0 0 0 0 0 0 0 0 0 0 0 0 31197.2507 0.0000 0.0000 O 0 0 0 0 0 0 0 0 0 0 0 0 82941.974226800.0295 0.0000 N 0 0 0 0 0 5 0 0 0 0 0 0 87825.999615830.3286 0.0000 O 0 0 0 0 0 0…	MMV1804183	Tizoxanide	173903-47-4	C(c1ccccc1O)(=O)Nc2ncc(s2)N(=O)=O	2-hydroxy-N-(5-nitro-1,3-thiazol-2-yl)benzamide	C10 H7 N3 O4 S	265.245	Anti-infective agent - Antiparasitic	prodrug of nitazoxanide
License Error_x000D_ SciTegic06082004062D_x000D_ _x000D_ 10 9 0 0 0 0 999 V2000_x000D_ 9.2868 -6.6500 0.0000 C 0 0_x000D_ 8.5724 -6.2375 0.0000 C 0 0_x000D_ 7.8579 -6.6500 0.0000 C 0 0_x000D_ 7.1434 -6.2375 0.0000 C 0 0_x000D_ 6.4289 -6.6500 0.0000 C 0 0_x000D_ 5.7145 -6.2375 0.0000 C 0 0_x000D_ 5.0000 -6.6500 0.0000 C 0 0_x000D_ 7.1434 -5.4125 0.0000 C 0 0_x000D_ 6.4289 -5.0000 0.0000 O 0 0_x000…	MMV003305	Valproic Acid	99-66-1	CCCC(CCC)C(=O)O	2-propylpentanoic acid	C8 H16 O2	144.214	Nervous system agent - Anticonvulsant	www.biorxiv.org/content/10.1101/2020.03.22.002386v1.full.pdf
Simeprevir ELEMENTL06082010492D 923604-59-5 Copyright (C) 2020 ACS 55 61 0 0 1 0 999 V2000 30159.779050419.2702 0.0000 C 0 0 0 0 0 0 0 0 0 0 0 0 36208.390255494.6570 0.0000 N 0 0 0 0 0 0 0 0 0 0 0 0 31530.890742643.3266 0.0000 O 0 0 0 0 0 0 0 0 0 0 0 0 34837.282663270.6007 0.0000 S 0 0 0 0 0 6 0 0 0 0 0 0 27061.338961899.4930 0.0000 O 0 0 0 0 0 0 0 0 0 0 0 0 42613.226264641.7084 0.0000 O 0 0 0 0 …	MMV1804227	Simeprevir	923604-59-5	C([C@@]12[C@]([H])(\C=C/CCCCN(C([C@]([H])(C[C@H](Oc3cc(c4scc(n4)C(C)C)nc(c(c(cc5)OC)C)c35)C6)[C@]6([H])C(N1)=O)=O)C)C2)(=O)NS(C7CC7)(=O)=O	(1R,4R,6S,7Z,15R,17R)-N-cyclopropylsulfonyl-17-[7-methoxy-8-methyl-2-(4-propan-2-yl-1,3-thiazol-2-yl)quinolin-4-yl]oxy-13-methyl-2,14-dioxo-3,13-diazatricyclo[13.3.0.04,6]octadec-7-ene-4-carboxamide	C38 H47 N5 O7 S2	749.939	Anti-infective agent - Antiviral agent	doi.org/10.20944/preprints202002.0438.v1
License Error_x000D_ SciTegic06082004062D_x000D_ _x000D_ 11 11 0 0 0 0 999 V2000_x000D_ -2.9977 -1.3034 0.0000 N 0 0_x000D_ -1.4977 -1.3007 0.0000 C 0 0_x000D_ -0.7459 -2.5987 0.0000 O 0 0_x000D_ -0.7500 0.0007 0.0000 C 0 0_x000D_ 0.7500 0.0007 0.0000 N 0 0_x000D_ 1.5000 1.2996 0.0000 C 0 0_x000D_ 0.7500 2.5987 0.0000 C 0 0_x000D_ -0.7500 2.5987 0.0000 N 0 0_x000D_ -1.5000 1.2996 0.0000 C 0 0_x00…	MMV688370	Favipiravir	259793-96-9	NC(=O)c1nc(F)cnc1O	6-fluoro-3-hydroxypyrazine-2-carboxamide	C5 H4 F N3 O2	157.103	Anti-infective agent - Antiviral agent	doi.org/10.1016/j.eng.2020.03.007
_x000D_ ELEMENTL06082010422D_x000D_ Dotmatics Elemental_x000D_ 26 28 0 0 0 0 999 V2000_x000D_ 12.9575 -5.0801 0.0000 C 0 0 0 0 0 0 0 0 0 0 0 0_x000D_ 10.9113 -6.2616 0.0000 C 0 0 0 0 0 0 0 0 0 0 0 0_x000D_ 9.8912 -7.7986 0.0000 F 0 0 0 0 0 0 0 0 0 0 0 0_x000D_ 9.8912 -6.8538 0.0000 C 0 0 0 0 0 0 0 0 0 0 0 0_x000D_ 5.6897 -8.0212 0.0000 C 0 0 0 0 0 0 0 0 0 0 0 0_x000D_ 4.5349 -8.2686 0.0000 C 0 0 …	MMV1804113	Vidofludimus	717824-30-1	c1c(cccc1OC)c2ccc(NC(=O)C3=C(C(=O)O)CCC3)c(F)c2	2-[[2-fluoro-4-(3-methoxyphenyl)phenyl]carbamoyl]cyclopentene-1-carboxylic acid	C20 H18 F N O4	355.36	Pharmaceutical immune agent	clinicaltrials.gov/ct2/show/NCT04379271
License Error_x000D_ SciTegic06082004062D_x000D_ _x000D_ 27 30 0 0 1 0 999 V2000_x000D_ 3.3910 1.8994 0.0000 C 0 0_x000D_ -1.2392 1.9838 0.0000 C 0 0_x000D_ 5.3758 -0.1017 0.0000 C 0 0_x000D_ 6.4892 0.9035 0.0000 C 0 0_x000D_ 5.6901 -1.5684 0.0000 O 0 0_x000D_ 4.3651 1.8252 0.0000 O 0 0_x000D_ -6.4892 0.6848 0.0000 O 0 0_x000D_ 0.2608 -0.6142 0.0000 C 0 0 2 0 0 0_x000D_ 1.7608 -0.6142 0.0000 C 0 …	MMV637496	Hydroxyprogesterone	68-96-2	CC(=O)[C@@]1(O)CC[C@H]2[C@H]3CCC4=CC(=O)CC[C@@]4(C)[C@H]3CC[C@]12C	(8S,9S,10S,13S,14S,17R)-17-acetyl-17-hydroxy-10,13-dimethyl-2,6,7,8,9,11,12,14,15,16-decahydro-1H-cyclopenta[a]phenanthren-3-one	C21 H30 O3	330.461	Antigonadotropin agent	doi.org/10.1101/2020.03.20.999730
Nafamostat ELEMENTL06082010432D 81525-10-2 Copyright (C) 2020 ACS 26 28 0 0 0 0 999 V2000 83571.425325980.7634 0.0000 C 0 0 0 0 0 0 0 0 0 0 0 0 83571.425333403.8386 0.0000 N 0 0 0 0 0 0 0 0 0 0 0 0 90000.000022269.2220 0.0000 N 0 0 0 0 0 0 0 0 0 0 0 0 45000.000011134.6129 0.0000 O 0 0 0 0 0 0 0 0 0 0 0 0 38571.429114846.1505 0.0000 C 0 0 0 0 0 0 0 0 0 0 0 0 38571.429122269.2258 0.0000 O 0 0 0 0 0…	MMV1804176	Nafamostat	81525-10-2	C(c(ccc(cc(cc1)OC(c2ccc(cc2)NC(N)=N)=O)c13)c3)(N)=N	(6-carbamimidoylnaphthalen-2-yl) 4-carbamimidamidobenzoate	C19 H17 N5 O2	347.371	Hematologic agent - Anticoagulant	doi.org/10.21203/rs.3.rs-23951/v1
Amuvatinib ELEMENTL06082010422D 850879-09-3 Copyright (C) 2020 ACS 32 37 0 0 0 0 999 V2000 44791.157046645.1782 0.0000 C 0 0 0 0 0 0 0 0 0 0 0 0 52786.805848344.7053 0.0000 N 0 0 0 0 0 0 0 0 0 0 0 0 39321.501452719.8469 0.0000 S 0 0 0 0 0 0 0 0 0 0 0 0 55312.794856118.9010 0.0000 C 0 0 0 0 0 0 0 0 0 0 0 0 26691.556413848.8643 0.0000 C 0 0 0 0 0 0 0 0 0 0 0 0 24165.5632 6074.6686 0.0000 C 0 0 0 0 …	MMV1804173	Amuvatinib	850879-09-3	C(N(CCN1c2ncnc(c3c(cccc3)o4)c24)CC1)(=S)NCc5ccc(OCO6)c6c5	N-(1,3-benzodioxol-5-ylmethyl)-4-([1]benzofuro[3,2-d]pyrimidin-4-yl)piperazine-1-carbothioamide	C23 H21 N5 O3 S	447.51	Antitumor agent	doi.org/10.21203/rs.3.rs-23951/v1
License Error_x000D_ SciTegic06052009092D_x000D_ _x000D_ 34 37 0 0 1 0 999 V2000_x000D_ -1.2990 0.2987 0.0000 C 0 0_x000D_ -1.2990 -1.2013 0.0000 C 0 0_x000D_ 0.0000 -1.9514 0.0000 C 0 0_x000D_ 1.2990 -1.2013 0.0000 C 0 0_x000D_ 1.2990 0.2987 0.0000 C 0 0_x000D_ 0.0000 1.0487 0.0000 C 0 0_x000D_ 2.5981 -1.9514 0.0000 C 0 0_x000D_ 3.8971 -1.2013 0.0000 C 0 0_x000D_ 3.8971 0.2987 0.0000 C 0 0 1 0 0…	MMV000011	Doxycycline	10592-13-9 564-25-0	C[C@@H]1[C@H]2[C@H](O)[C@H]3[C@H](N(C)C)C(=O)C(=C(O)[C@@]3(O)C(=C2C(=O)c4c(O)cccc14)O)C(=O)N	(4S,4aR,5S,5aR,6R,12aS)-4-(dimethylamino)-1,5,10,12,12a-pentahydroxy-6-methyl-3,11-dioxo-4a,5,5a,6-tetrahydro-4H-tetracene-2-carboxamide	C22 H24 N2 O8	444.435	Anti-infective agent - Antibacterial	doi.org/10.1101/2020.03.20.999730
License Error_x000D_ SciTegic06082004062D_x000D_ _x000D_ 37 41 0 0 1 0 999 V2000_x000D_ 3.7477 -0.6480 0.0000 C 0 0_x000D_ 3.0000 -1.9493 0.0000 C 0 0 1 0 0 0_x000D_ 2.9955 0.6507 0.0000 C 0 0 2 0 0 0_x000D_ 1.5000 -1.9493 0.0000 C 0 0_x000D_ 3.7500 -3.2483 0.0000 C 0 0 1 0 0 0_x000D_ 2.2851 1.9486 0.0000 C 0 0_x000D_ 2.2892 -0.6494 0.0000 N 0 0_x000D_ 0.7500 -3.2483 0.0000 C 0 0 1 0 0 0_x000D_ 5…	MMV688731	Emetine	316-42-7 483-18-1	CC[C@H]1CN2CCc3cc(OC)c(OC)cc3[C@@H]2C[C@@H]1C[C@H]4NCCc5cc(OC)c(OC)cc45	(2S,3R,11bS)-2-[[(1R)-6,7-dimethoxy-1,2,3,4-tetrahydroisoquinolin-1-yl]methyl]-3-ethyl-9,10-dimethoxy-2,3,4,6,7,11b-hexahydro-1H-benzo[a]quinolizine	C29 H40 N2 O4	480.639	Anti-infective agent - Antiparasitic	doi.org/10.21203/rs.3.rs-23951/v1
Triparanol ELEMENTL06082010492D 78-41-1 Copyright (C) 2020 ACS 31 33 0 0 0 0 999 V2000 57857.145614846.1467 0.0000 C 0 0 0 0 0 0 0 0 0 0 0 0 64285.716411134.6091 0.0000 C 0 0 0 0 0 0 0 0 0 0 0 0 57857.1456 7423.0715 0.0000 O 0 0 0 0 0 0 0 0 0 0 0 0 32142.8582 0.0000 0.0000 O 0 0 0 0 0 0 0 0 0 0 0 0 25714.2836 3711.5376 0.0000 C 0 0 0 0 0 0 0 0 0 0 0 0 19285.7127 0.0000 0.0000 C 0 0 0 0 0 0 0 0 0 …	MMV1804244	Triparanol	78-41-1	C(c1ccc(cc1)C)(c2ccc(cc2)OCCN(CC)CC)(O)Cc3ccc(cc3)Cl	2-(4-chlorophenyl)-1-[4-[2-(diethylamino)ethoxy]phenyl]-1-(4-methylphenyl)ethanol	C27 H32 Cl N O2	438.001	Antilipemic agent	doi.org/10.1101/2020.03.25.008482.
License Error_x000D_ SciTegic06082004062D_x000D_ _x000D_ 22 24 0 0 0 0 999 V2000_x000D_ 9.4661 -8.8676 0.0000 C 0 0_x000D_ 8.7520 -9.2808 0.0000 N 0 0_x000D_ 8.7527 -10.1058 0.0000 C 0 0_x000D_ 8.0372 -8.8689 0.0000 C 0 0_x000D_ 8.0364 -8.0439 0.0000 C 0 0_x000D_ 7.3216 -7.6320 0.0000 C 0 0_x000D_ 7.3209 -6.8070 0.0000 N 0 0_x000D_ 6.5773 -6.4496 0.0000 C 0 0_x000D_ 5.9731 -7.0115 0.0000 C 0 0_x0…	MMV002092	Clomipramine	17321-77-6 303-49-1	CN(C)CCCN1c2ccccc2CCc3ccc(Cl)cc13	3-(2-chloro-5,6-dihydrobenzo[b][1]benzazepin-11-yl)-N,N-dimethylpropan-1-amine	C19 H23 Cl N2	314.86	Nervous system agent - Antidepressant	doi.org/10.1101/2020.03.25.008482.
Sofosbuvir ELEMENTL06082010472D 1190307-88-0 Copyright (C) 2020 ACS 37 39 0 0 1 0 999 V2000 58530.8602 3826.3164 0.0000 C 0 0 0 0 0 0 0 0 0 0 0 0 49936.8126 0.0000 0.0000 F 0 0 0 0 0 0 0 0 0 0 0 0 70845.245128561.8356 0.0000 O 0 0 0 0 0 0 0 0 0 0 0 0 32588.023825371.2170 0.0000 C 0 0 0 0 0 0 0 0 0 0 0 0 32588.023834778.5656 0.0000 O 0 0 0 0 0 0 0 0 0 0 0 0 24441.017939482.2423 0.0000 P 0 0 0 0 0 …	MMV1804189	Sofosbuvir	1190307-88-0	C[C@]([C@H](O)[C@@H](CO[P@@](=O)(N[C@@H](C)C(=O)OC(C)C)Oc1ccccc1)O2)(F)[C@]2([H])N3C=CC(NC3=O)=O	propan-2-yl (2S)-2-[[[(2S,3S,4S,5S)-5-(2,4-dioxopyrimidin-1-yl)-4-fluoro-3-hydroxy-4-methyloxolan-2-yl]methoxy-phenoxyphosphoryl]amino]propanoate	C22 H29 F N3 O9 P	529.453	Anti-infective agent - Antiviral agent	doi.org/10.1016/j.lfs.2020.117592
Camostat ELEMENTL06082010492D 59721-28-7 Copyright (C) 2020 ACS 29 30 0 0 0 0 999 V2000 31764.705712226.2413 0.0000 C 0 0 0 0 0 0 0 0 0 0 0 0 37058.8228 9169.6810 0.0000 O 0 0 0 0 0 0 0 0 0 0 0 0 31764.705718339.3620 0.0000 O 0 0 0 0 0 0 0 0 0 0 0 0 10588.2342 0.0000 0.0000 N 0 0 0 0 0 0 0 0 0 0 0 0 5294.1171 3056.5603 0.0000 C 0 0 0 0 0 0 0 0 0 0 0 0 5294.1171 9169.6810 0.0000 N 0 0 0 0 0 0 0 0 …	MMV1804242	Camostat	59721-28-7 59721-29-8	C(c1ccc(cc1)NC(N)=N)(=O)Oc2ccc(cc2)CC(=O)OCC(=O)N(C)C	[4-[2-[2-(dimethylamino)-2-oxoethoxy]-2-oxoethyl]phenyl] 4-carbamimidamidobenzoate	C20 H22 N4 O5	398.412	Anti-inflammatory agent - Pancreatitis	doi.org/10.21203/rs.3.rs-23951/v1
2-(4,6-Dimethylpyrazolo[1,5-a]pyrazin-2-yl)-7-(1-ethyl-4-piperidinyl)-9-methy... ELEMENTL06082010502D 1449597-34-5 Copyright (C) 2020 ACS 31 35 0 0 0 0 999 V2000 41067.9024 3531.3699 0.0000 O 0 0 0 0 0 0 0 0 0 0 0 0 21188.219545445.0926 0.0000 C 0 0 0 0 0 0 0 0 0 0 0 0 53300.925031782.3293 0.0000 C 0 0 0 0 0 0 0 0 0 0 0 0 0.000033212.0664 0.0000 C 0 0 0 0 0 0 0 0 0 0 0 0 83883.4851 0.0000 0.0000 …	MMV1804249	SMN-C3	1449597-34-5	O=C(N(C=C(C1CCN(CC1)CC)C=C2C)C2=N3)C=C3c4cc(c(nc(c5)C)C)n5n4	2-(4,6-dimethylpyrazolo[1,5-a]pyrazin-2-yl)-7-(1-ethylpiperidin-4-yl)-9-methylpyrido[1,2-a]pyrimidin-4-one	C24 H28 N6 O	416.519	Genetic disorders agent - Spinal muscular atrophy
License Error_x000D_ SciTegic06082004062D_x000D_ _x000D_ 32 34 0 0 1 0 999 V2000_x000D_ 0.2268 -2.0806 0.0000 C 0 0_x000D_ 1.7275 -2.0783 0.0000 N 0 0_x000D_ -0.5264 -0.7823 0.0000 C 0 0_x000D_ 2.4794 -3.3773 0.0000 C 0 0 1 0 0 0_x000D_ 2.4770 -0.7781 0.0000 C 0 0_x000D_ -2.0263 -0.7823 0.0000 C 0 0_x000D_ 0.2237 0.5168 0.0000 C 0 0_x000D_ 3.9802 -3.3773 0.0000 C 0 0_x000D_ 1.7283 -4.6767 0.0000 …	MMV002295	Valsartan	137862-53-4	CCCCC(=O)N(Cc1ccc(cc1)c2ccccc2c3nn[nH]n3)[C@@H](C(C)C)C(=O)O	(2S)-3-methyl-2-[pentanoyl-[[4-[2-(1H-tetrazol-5-yl)phenyl]phenyl]methyl]amino]butanoic acid	C24 H29 N5 O3	435.519	Cardiovascular agent - Antihypertensive	doi.org/10.1101/2020.03.20.999730
License Error_x000D_ SciTegic06082004062D_x000D_ _x000D_ 31 33 0 0 0 0 999 V2000_x000D_ 8.9722 -5.0000 0.0000 C 0 0_x000D_ 8.9722 -5.8250 0.0000 C 0 0_x000D_ 8.2577 -6.2376 0.0000 C 0 0_x000D_ 8.2577 -7.0626 0.0000 C 0 0_x000D_ 7.5432 -7.4751 0.0000 C 0 0_x000D_ 6.7895 -7.1395 0.0000 O 0 0_x000D_ 6.2375 -7.7526 0.0000 C 0 0_x000D_ 5.4125 -7.7526 0.0000 C 0 0_x000D_ 5.0000 -8.4671 0.0000 C 0 0_x00…	MMV001992	Amiodarone	1951-25-3 19774-82-4	CCCCc1oc2ccccc2c1C(=O)c3cc(I)c(OCCN(CC)CC)c(I)c3	(2-butyl-1-benzofuran-3-yl)-[4-[2-(diethylamino)ethoxy]-3,5-diiodophenyl]methanone	C25 H29 I2 N O3	645.319	Cardiovascular agent - Antiarrhythmic	clinicaltrials.gov/ct2/show/NCT04351763
License Error_x000D_ SciTegic06082004062D_x000D_ _x000D_ 85 85 0 0 1 0 999 V2000_x000D_ 8.7782 10.5770 0.0000 C 0 0_x000D_ 7.5901 10.4078 0.0000 C 0 0_x000D_ 7.0296 9.0155 0.0000 C 0 0_x000D_ 5.5438 8.8039 0.0000 C 0 0_x000D_ 4.9832 7.4117 0.0000 C 0 0 2 0 0 0_x000D_ 3.4974 7.2001 0.0000 C 0 0 2 0 0 0_x000D_ 2.9324 5.7968 0.0000 C 0 0 1 0 0 0_x000D_ 1.4932 6.2194 0.0000 C 0 0_x000D_ 1.7203 7.3977…	MMV001860	Cyclosporine	59865-13-3	CC[C@@H]1NC(=O)[C@H]([C@H](O)[C@H](C)C\C=C\C)N(C)C(=O)[C@H](C(C)C)N(C)C(=O)[C@H](CC(C)C)N(C)C(=O)[C@@H](CC(C)C)N(C)C(=O)[C@@H](C)NC(=O)[C@H](C)NC(=O)[C@H](CC(C)C)N(C)C(=O)[C@@H](NC(=O)[C@H](CC(C)C)N(C)C(=O)CN(C)C1=O)C(C)C	(3S,6S,9R,12R,15S,18S,21S,24S,30S,33S)-30-ethyl-33-[(E,1R,2R)-1-hydroxy-2-methylhex-4-enyl]-1,4,7,10,12,15,19,25,28-nonamethyl-6,9,18,24-tetrakis(2-methylpropyl)-3,21-di(propan-2-yl)-1,4,7,10,13,16,19,22,25,28,31-undecazacyclotritriacontane-2,5,8,11,14,17,20,23,26,29,32-undecone	C62 H111 N11 O12	1202.61	Pharmaceutical immune agent - Immunosuppressant	doi.org/10.1101/2020.03.20.999730
License Error_x000D_ SciTegic06082004062D_x000D_ _x000D_ 64 70 0 0 0 0 999 V2000_x000D_ 3.7100 -3.9993 0.0000 C 0 0 2 0 0 0_x000D_ 3.7100 -5.5993 0.0000 C 0 0 2 0 0 0_x000D_ 4.9400 -3.1993 0.0000 C 0 0 2 0 0 0_x000D_ 2.4800 -3.1993 0.0000 C 0 0_x000D_ 3.7100 -2.7993 0.0000 O 0 0_x000D_ 1.2500 -5.5993 0.0000 O 0 0_x000D_ 4.9400 -6.5093 0.0000 C 0 0 1 0 0 0_x000D_ 4.9400 -1.4893 0.0000 C 0 0_x000D_…	MMV672931	Ivermectin	70288-86-7	CC[C@H](C)[C@H]1O[C@]2(CC[C@@H]1C)C[C@@H]3C[C@@H](C\C=C(/C)\[C@@H](O[C@H]4C[C@H](OC)[C@@H](O[C@H]5C[C@H](OC)[C@@H](O)[C@H](C)O5)[C@H](C)O4)[C@@H](C)\C=C\C=C\6/CO[C@@H]7[C@H](O)C(=C[C@@H](C(=O)O3)[C@]67O)C)O2	rac-(1S,4R,5'R,6S,6'S,8S,10E,12R,13R,14E,16E,20S,21S,24R)-21,24-dihydroxy-5',11,13,22-tetramethyl-6'-[rac-(2R)-butan-2-yl]-12-[rac-(2S,4R,5R,6R)-4-methoxy-6-methyl-5-[rac-(2R,4R,5R,6R)-5-hydroxy-4-methoxy-6-methyloxan-2-yl]oxyoxan-2-yl]oxyspiro[3,7,19-trioxatetracyclo[15.6.1.14,8.020,24]pentacosa-10,14,16,22-tetraene-6,2'-oxane]-2-one	C48 H74 O14	875.093	Anti-infective agent - Antiparasitic	doi.org/10.1016/j.antiviral.2020.104787
License Error_x000D_ SciTegic06082004062D_x000D_ _x000D_ 25 27 0 0 0 0 999 V2000_x000D_ 9.3228 -10.0922 0.0000 C 0 0_x000D_ 8.6084 -9.6797 0.0000 O 0 0_x000D_ 8.6084 -8.8547 0.0000 C 0 0_x000D_ 7.8939 -8.4422 0.0000 C 0 0_x000D_ 7.8939 -7.6172 0.0000 C 0 0_x000D_ 8.6083 -7.2047 0.0000 C 0 0_x000D_ 9.3228 -7.6172 0.0000 C 0 0_x000D_ 9.3228 -8.4422 0.0000 C 0 0_x000D_ 9.9359 -7.0651 0.0000 C 0 0_x0…	MMV002813	Indomethacin	53-86-1	COc1ccc2c(c1)c(CC(=O)O)c(C)n2C(=O)c3ccc(Cl)cc3	2-[1-(4-chlorobenzoyl)-5-methoxy-2-methylindol-3-yl]acetic acid	C19 H16 Cl N O4	357.793	Anti-inflammatory agent	doi.org/10.1111/ijcp.13535
License Error_x000D_ SciTegic06082004062D_x000D_ _x000D_ 14 14 0 0 1 0 999 V2000_x000D_ 9.2663 0.2483 0.0000 C 0 0_x000D_ 8.9307 -0.5054 0.0000 C 0 0 2 0 0 0_x000D_ 9.4157 -1.1728 0.0000 C 0 0_x000D_ 10.2362 -1.0865 0.0000 S 0 0_x000D_ 8.1103 -0.5917 0.0000 C 0 0_x000D_ 7.7747 -1.3453 0.0000 O 0 0_x000D_ 7.6253 0.0759 0.0000 N 0 0_x000D_ 7.8803 0.8604 0.0000 C 0 0_x000D_ 7.2129 1.3454 0.0000 C 0 …	MMV002086	Captopril	62571-86-2	C[C@H](CS)C(=O)N1CCC[C@H]1C(=O)O	(2S)-1-[(2S)-2-methyl-3-sulfanylpropanoyl]pyrrolidine-2-carboxylic acid	C9 H15 N O3 S	217.285	Cardiovascular agent - Antihypertensive	clinicaltrials.gov/ct2/show/NCT04355429
License Error_x000D_ SciTegic06082004062D_x000D_ _x000D_ 17 18 0 0 1 0 999 V2000_x000D_ 10.6902 0.3591 0.0000 N 0 0_x000D_ 10.5186 -0.4479 0.0000 C 0 0_x000D_ 11.1317 -1.0000 0.0000 O 0 0_x000D_ 9.7340 -0.7029 0.0000 C 0 0_x000D_ 9.4791 -1.4874 0.0000 N 0 0_x000D_ 8.6540 -1.4874 0.0000 C 0 0_x000D_ 8.3992 -0.7029 0.0000 N 0 0_x000D_ 9.0665 -0.2180 0.0000 N 0 0_x000D_ 7.6145 -0.4480 0.0000 C 0 0 2…	MMV001439	Ribavirin	36791-04-5	NC(=O)c1ncn(n1)[C@@H]2O[C@H](CO)[C@@H](O)[C@H]2O	1-[(2R,3R,4S,5R)-3,4-dihydroxy-5-(hydroxymethyl)oxolan-2-yl]-1,2,4-triazole-3-carboxamide	C8 H12 N4 O5	244.205	Anti-infective agent - Antiviral agent	doi.org/10.1016/S0140-6736(20)31042-4
License Error_x000D_ SciTegic06082004062D_x000D_ _x000D_ 32 34 0 0 0 0 999 V2000_x000D_ 5.0000 -7.1434 0.0000 C 0 0_x000D_ 5.4125 -7.8579 0.0000 N 0 0_x000D_ 6.2375 -7.8579 0.0000 C 0 0_x000D_ 6.6500 -7.1434 0.0000 O 0 0_x000D_ 6.6500 -8.5724 0.0000 C 0 0_x000D_ 6.2375 -9.2868 0.0000 N 0 0_x000D_ 6.6500 -10.0013 0.0000 C 0 0_x000D_ 7.4750 -10.0013 0.0000 C 0 0_x000D_ 7.8875 -9.2868 0.0000 C 0 0_x…	MMV010306	Sorafenib	284461-73-0	CNC(=O)c1cc(Oc2ccc(NC(=O)Nc3ccc(Cl)c(c3)C(F)(F)F)cc2)ccn1	4-[4-[[4-chloro-3-(trifluoromethyl)phenyl]carbamoylamino]phenoxy]-N-methylpyridine-2-carboxamide	C21 H16 Cl F3 N4 O3	464.831	Antitumor agent - Kidney cancer	doi.org/10.21203/rs.3.rs-23951/v1
4-[2-[2-[(2R)-2-Methyl-1-pyrrolidinyl]ethyl]-5-benzofuranyl]benzonitrile ELEMENTL06082010482D 460746-46-7 Copyright (C) 2020 ACS 25 28 0 0 1 0 999 V2000 66503.520423196.1532 0.0000 C 0 0 0 0 0 0 0 0 0 0 0 0 70369.545929892.3050 0.0000 C 0 0 0 0 0 0 0 0 0 0 0 0 6696.1518 3866.0255 0.0000 C 0 0 0 0 0 0 0 0 0 0 0 0 0.0000 0.0000 0.0000 N 0 0 0 0 0 0 0 0 0 0 0 0 80257.044643501.2859 0.0000 C 0 0 0 0 …	MMV1804225	ABT 239	460746-46-7 460748-71-4	C(c(oc(ccc(c1ccc(cc1)C#N)c2)c23)c3)CN4CCC[C@H]4C	4-[2-[2-[(2R)-2-methylpyrrolidin-1-yl]ethyl]-1-benzofuran-5-yl]benzonitrile	C22 H22 N2 O	330.423	Nervous system agent
License Error_x000D_ SciTegic06082004062D_x000D_ _x000D_ 23 24 0 0 0 0 999 V2000_x000D_ 5.7134 2.4697 0.0000 C 0 0_x000D_ 5.7134 3.2994 0.0000 C 0 0_x000D_ 6.4295 3.7184 0.0000 C 0 0_x000D_ 7.1455 3.2994 0.0000 C 0 0_x000D_ 7.1420 2.4697 0.0000 C 0 0_x000D_ 6.4295 2.0591 0.0000 C 0 0_x000D_ 7.8619 3.7134 0.0000 N 0 0_x000D_ 8.5792 3.2931 0.0000 C 0 0_x000D_ 8.5757 2.4636 0.0000 C 0 0_x000D_ 7.854…	MMV000013	Hydroxychloroquine	118-42-3	CCN(CCO)CCCC(C)Nc1ccnc2cc(Cl)ccc12	2-[4-[(7-chloroquinolin-4-yl)amino]pentyl-ethylamino]ethanol	C18 H26 Cl N3 O	335.872	Anti-infective agent - Antimalarial	doi.org/10.1093/cid/ciaa237 doi.org/10.4414/smw.2020.20262 doi.org/10.1016/j.ijantimicag.2020.105949
License Error_x000D_ SciTegic06082004062D_x000D_ _x000D_ 23 26 0 0 0 0 999 V2000_x000D_ 4.1661 -0.4640 0.0000 C 0 0_x000D_ 2.6654 -0.4883 0.0000 O 0 0_x000D_ -1.8778 4.3488 0.0000 C 0 0_x000D_ 4.9382 -1.7510 0.0000 C 0 0_x000D_ 6.4381 -1.7288 0.0000 C 0 0_x000D_ 4.2076 -3.0610 0.0000 C 0 0_x000D_ 7.2073 -3.0166 0.0000 C 0 0_x000D_ 4.9767 -4.3488 0.0000 C 0 0_x000D_ 6.4766 -4.3266 0.0000 C 0 0_x00…	MMV001977	Benztropine	132-17-2 86-13-5	CN1[C@H]2CC[C@H]1CC(C2)OC(c3ccccc3)c4ccccc4	rac-(1R,5R)-3-benzhydryloxy-8-methyl-8-azabicyclo[3.2.1]octane	C21 H25 N O	307.429	Nervous system agent - Antipsychotic	doi.org/10.1101/2020.03.25.008482.
Manidipine ELEMENTL06082010482D 89226-50-6 Copyright (C) 2020 ACS 45 49 0 0 0 0 999 V2000 25714.283637115.3800 0.0000 C 0 0 0 0 0 0 0 0 0 0 0 0 32142.858233403.8424 0.0000 O 0 0 0 0 0 0 0 0 0 0 0 0 25714.283644538.4553 0.0000 O 0 0 0 0 0 0 0 0 0 0 0 0 38571.429137115.3763 0.0000 C 0 0 0 0 0 0 0 0 0 0 0 0 45000.000033403.8424 0.0000 C 0 0 0 0 0 0 0 0 0 0 0 0 12857.141814846.1505 0.0000 C 0 0 0 0 0…	MMV1804194	Manidipine	89226-50-6 89226-75-5	C(C1=C(NC(=C(C1c2cccc(c2)N(=O)=O)C(=O)OC)C)C)(=O)OCCN3CCN(CC3)C(c4ccccc4)c5ccccc5	2-(4-benzhydrylpiperazin-1-yl)ethyl (5Z)-5-[hydroxy(methoxy)methylidene]-2,6-dimethyl-4-(3-nitrophenyl)-4H-pyridine-3-carboxylate	C35 H38 N4 O6	610.699	Cardiovascular agent - Antihypertensive	Corona virus drugs – a brief overview of past, present and future, Journal of PeerScientist 2(2): e1000013
Almitrine ELEMENTL06082010432D 27469-53-0 Copyright (C) 2020 ACS 35 38 0 0 0 0 999 V2000 25714.283648249.9891 0.0000 C 0 0 0 0 0 0 0 0 0 0 0 0 0.000033403.8424 0.0000 F 0 0 0 0 0 0 0 0 0 0 0 0 25714.283677942.2901 0.0000 F 0 0 0 0 0 0 0 0 0 0 0 0 70714.291137115.3763 0.0000 N 0 0 0 0 0 0 0 0 0 0 0 0 77142.858233403.8424 0.0000 C 0 0 0 0 0 0 0 0 0 0 0 0 83571.425337115.3763 0.0000 C 0 0 0 0 0 0 0 …	MMV1804175	Almitrine	27469-53-0 29608-49-9	C(c1ccc(cc1)F)(c2ccc(cc2)F)N3CCN(c4nc(nc(n4)NCC=C)NCC=C)CC3	6-[4-[bis(4-fluorophenyl)methyl]piperazin-1-yl]-2-N,4-N-bis(prop-2-enyl)-1,3,5-triazine-2,4-diamine	C26 H29 F2 N7	477.552	Respiratory system agent	doi.org/10.21203/rs.3.rs-23951/v1
License Error_x000D_ SciTegic06082004062D_x000D_ _x000D_ 21 22 0 0 0 0 999 V2000_x000D_ 2.5980 1.5000 0.0000 C 0 0_x000D_ 3.5980 1.5000 0.0000 C 0 0_x000D_ 4.0980 2.3660 0.0000 O 0 0_x000D_ 4.0981 0.6340 0.0000 O 0 0_x000D_ 3.5981 -0.2320 0.0000 C 0 0_x000D_ 2.5981 -0.2320 0.0000 C 0 0_x000D_ 2.0981 -1.0980 0.0000 C 0 0_x000D_ 2.5981 -1.9640 0.0000 C 0 0_x000D_ 3.5981 -1.9640 0.0000 C 0 0_x000D_ …	MMV688991	Nitazoxanide	55981-09-4	CC(=O)Oc1ccccc1C(=O)Nc2ncc(s2)[N+](=O)[O-]	[2-[(5-nitro-1,3-thiazol-2-yl)carbamoyl]phenyl] acetate	C12 H9 N3 O5 S	307.282	Anti-infective agent - Antiparasitic	doi.org/10.20944/preprints202004.0432.v1
License Error_x000D_ SciTegic06082004062D_x000D_ _x000D_ 31 36 0 0 0 0 999 V2000_x000D_ 14.4739 -8.3538 0.0000 N 0 0_x000D_ 13.6078 -7.8537 0.0000 C 0 0_x000D_ 13.8158 -6.8756 0.0000 N 0 0_x000D_ 14.8103 -6.7712 0.0000 N 0 0_x000D_ 15.2171 -7.6847 0.0000 C 0 0_x000D_ 16.1952 -7.8926 0.0000 O 0 0_x000D_ 12.7418 -8.3537 0.0000 C 0 0_x000D_ 12.7418 -9.3537 0.0000 C 0 0_x000D_ 11.8757 -9.8537 0.0000 …	MMV690727	MK-2206	1032349-93-1 1032350-13-2	NC1(CCC1)c2ccc(cc2)c3nc4ccn5c(O)nnc5c4cc3c6ccccc6	8-[4-(1-aminocyclobutyl)phenyl]-9-phenyl-[1,2,4]triazolo[3,4-f][1,6]naphthyridin-3-ol	C25 H21 N5 O	407.467	Antitumor agent	doi.org/10.1101/2020.04.15.997254
License Error_x000D_ SciTegic06082004062D_x000D_ _x000D_ 36 40 0 0 0 0 999 V2000_x000D_ 5.2972 -10.7591 0.0000 C 0 0_x000D_ 5.5521 -9.9745 0.0000 C 0 0_x000D_ 5.0000 -9.3614 0.0000 C 0 0_x000D_ 6.3590 -9.8029 0.0000 N 0 0_x000D_ 6.6139 -9.0183 0.0000 C 0 0_x000D_ 7.4209 -8.8467 0.0000 C 0 0_x000D_ 7.9730 -9.4598 0.0000 N 0 0_x000D_ 7.7181 -10.2444 0.0000 C 0 0_x000D_ 6.9111 -10.4159 0.0000 C 0 0_…	MMV1804243	Terconazole	67915-31-5	CC(C)N1CCN(CC1)c2ccc(OC[C@H]3CO[C@@](Cn4cncn4)(O3)c5ccc(Cl)cc5Cl)cc2	1-propan-2-yl-4-[4-[[rac-(2R,4S)-2-(2,4-dichlorophenyl)-2-(1,2,4-triazol-1-ylmethyl)-1,3-dioxolan-4-yl]methoxy]phenyl]piperazine	C26 H31 Cl2 N5 O3	532.472	Anti-infective agent - Antifungal	doi.org/10.1016/j.ijantimicag.2020.105969
License Error_x000D_ SciTegic06082004062D_x000D_ _x000D_ 44 52 0 0 1 0 999 V2000_x000D_ -2.8781 -2.1309 0.0000 C 0 0_x000D_ -1.8299 -1.5466 0.0000 C 0 0 1 0 0 0_x000D_ -0.9800 -3.2566 0.0000 N 0 0_x000D_ -2.6502 -0.2268 0.0000 C 0 0 2 0 0 0_x000D_ -1.0600 -0.2966 0.0000 O 0 0_x000D_ 0.2400 -3.9166 0.0000 C 0 0_x000D_ -2.1300 -3.9366 0.0000 C 0 0_x000D_ -4.1488 -0.1917 0.0000 O 0 0_x000D_ -1.8100 …	MMV010288	Midostaurin	120685-11-2	CO[C@@H]1[C@@H](C[C@H]2O[C@]1(C)n3c4ccccc4c5c6CNC(=O)c6c7c8ccccc8n2c7c35)N(C)C(=O)c9ccccc9	N-[(2S,3R,4R,6R)-3-methoxy-2-methyl-16-oxo-29-oxa-1,7,17-triazaoctacyclo[12.12.2.12,6.07,28.08,13.015,19.020,27.021,26]nonacosa-8,10,12,14(28),15(19),20(27),21,23,25-nonaen-4-yl]-N-methylbenzamide	C35 H30 N4 O4	570.637	Antitumor agent - Leukemia	doi.org/10.1101/2020.03.22.002386.
License Error_x000D_ SciTegic06082004062D_x000D_ _x000D_ 0 0 0 0 0 0 999 V3000_x000D_ M V30 BEGIN CTAB_x000D_ M V30 COUNTS 30 31 0 0 0_x000D_ M V30 BEGIN ATOM_x000D_ M V30 1 C 5.6947 -6.2161 0 0_x000D_ M V30 2 C 5.6947 -5.4081 0 0_x000D_ M V30 3 C 6.3919 -5 0 0_x000D_ M V30 4 C 7.0892 -5.4081 0 0_x000D_ M V30 5 C 7.0858 -6.2161 0 0_x000D_ M V30 6 C 6.3919 -6.6159 0 0_x000D_ M V30 7 N 7.7868 -5.00…	MMV000056	Ferroquine	185055-67-8	c1cc(c(NC[C]2[CH][CH][CH][C]2CN(C)C)ccn3)c3cc1Cl.[Fe].[CH]4[CH][CH][CH][CH]4	7-chloro-N-[[2-[(dimethylamino)methyl]cyclopentyl]methyl]quinolin-4-amine;cyclopentane;iron	C23 H24 Cl Fe N3	433.766	Anti-infective agent - Antimalarial	doi:10.20944/preprints202003.0275.v1
1-[(6-Chloroimidazo[2,1-b]thiazol-5-yl)sulfonyl]-1H-indole-3-ethanamine ELEMENTL06082010502D 554403-49-5 Copyright (C) 2020 ACS 24 27 0 0 0 0 999 V2000 37152.800358099.9453 0.0000 S 0 0 0 0 0 6 0 0 0 0 0 0 48961.939954262.9237 0.0000 O 0 0 0 0 0 0 0 0 0 0 0 0 25343.660761936.9669 0.0000 O 0 0 0 0 0 0 0 0 0 0 0 0 37152.800314390.7510 0.0000 C 0 0 0 0 0 0 0 0 0 0 0 0 49298.331111809.1396 0.0000 C 0…	MMV1804248	SAX-187	554403-49-5 1883548-85-3	S(c1c(nc(scc2)n12)Cl)(n3cc(c(cccc4)c34)CCN)(=O)=O	2-[1-(6-chloroimidazo[2,1-b][1,3]thiazol-5-yl)sulfonylindol-3-yl]ethanamine	C15 H13 Cl N4 O2 S2	380.872	Nervous system agent - Antipsychotic
Abemaciclib ELEMENTL06082010432D 1231929-97-7 Copyright (C) 2020 ACS 37 41 0 0 0 0 999 V2000 82588.862621791.5996 0.0000 C 0 0 0 0 0 0 0 0 0 0 0 0 78710.900226098.5165 0.0000 C 0 0 0 0 0 0 0 0 0 0 0 0 88257.746222996.5570 0.0000 C 0 0 0 0 0 0 0 0 0 0 0 0 70267.0045 0.0000 0.0000 F 0 0 0 0 0 0 0 0 0 0 0 0 90000.000011591.0503 0.0000 C 0 0 0 0 0 0 0 0 0 0 0 0 65247.930226079.8631 0.0000 F 0 0 0 0 0…	MMV1804174	Abemaciclib	1231929-97-7	C(n1c(nc(c(cc(c2c(cnc(n2)Nc3ncc(cc3)CN4CCN(CC4)CC)F)c5)F)c15)C)(C)C	N-[5-[(4-ethylpiperazin-1-yl)methyl]pyridin-2-yl]-5-fluoro-4-(7-fluoro-2-methyl-3-propan-2-ylbenzimidazol-5-yl)pyrimidin-2-amine	C27 H32 F2 N8	506.593	Antitumor agent - Breast cancer	doi.org/10.1101/2020.03.20.999730
Pevonedistat ELEMENTL06082010472D 905579-51-3 Copyright (C) 2020 ACS 32 36 0 0 1 0 999 V2000 30814.191214042.0206 0.0000 N 0 0 0 0 0 0 0 0 0 0 0 0 68745.783051346.3127 0.0000 C 0 0 0 0 0 0 0 0 0 0 0 0 73593.953444673.3743 0.0000 O 0 0 0 0 0 0 0 0 0 0 0 0 81796.976745535.5452 0.0000 S 0 0 0 0 0 6 0 0 0 0 0 0 90000.000046397.7204 0.0000 N 0 0 0 0 0 0 0 0 0 0 0 0 82659.151937332.5261 0.0000 O 0 0 0 …	MMV1804191	Pevonedistat	905579-51-3	N([C@H]1CCc(cccc2)c12)c(ncn3)c(ccn4[C@@]5([H])C[C@H](O)[C@H](COS(=O)(=O)N)C5)c34	[(1S,2S,4R)-4-[4-[[(1R)-2,3-dihydro-1H-inden-1-yl]amino]pyrrolo[2,3-d]pyrimidin-7-yl]-2-hydroxycyclopentyl]methyl sulfamate	C21 H25 N5 O4 S	443.519	Antitumor agent	doi.org/10.21203/rs.3.rs-23951/v1 doi.org/10.1038/s41586-020-2286-9
License Error_x000D_ SciTegic06082004062D_x000D_ _x000D_ 48 54 0 0 1 0 999 V2000_x000D_ -2.6357 5.2457 0.0000 O 0 0_x000D_ -2.9416 6.4059 0.0000 C 0 0_x000D_ -3.7000 4.1879 0.0000 C 0 0_x000D_ -3.3000 2.7378 0.0000 C 0 0_x000D_ -5.2100 4.5879 0.0000 C 0 0_x000D_ -4.3700 1.6379 0.0000 C 0 0_x000D_ -0.4000 1.7778 0.0000 O 0 0_x000D_ -5.6275 6.0290 0.0000 O 0 0_x000D_ -6.2600 3.5078 0.0000 C 0 0_x00…	MMV003277	Tetrandrine	518-34-3	COc1ccc2C[C@@H]3N(C)CCc4cc(OC)c(OC)c(Oc5cc6[C@H](Cc7ccc(Oc1c2)cc7)N(C)CCc6cc5OC)c34	(1S,14S)-9,20,21,25-tetramethoxy-15,30-dimethyl-7,23-dioxa-15,30-diazaheptacyclo[22.6.2.23,6.18,12.114,18.027,31.022,33]hexatriaconta-3(36),4,6(35),8(34),9,11,18(33),19,21,24(32),25,27(31)-dodecaene	C38 H42 N2 O6	622.75	Antitumor agent	clinicaltrials.gov/ct2/show/NCT04308317
License Error_x000D_ SciTegic06082004062D_x000D_ _x000D_ 46 49 0 0 1 0 999 V2000_x000D_ 1.2912 1.5097 0.0000 C 0 0_x000D_ 5.1894 0.7504 0.0000 C 0 0_x000D_ 3.8912 1.5035 0.0000 C 0 0 1 0 0 0_x000D_ 2.5894 0.7566 0.0000 N 0 0_x000D_ 5.1873 -0.7504 0.0000 C 0 0 2 0 0 0_x000D_ 6.4855 -1.5035 0.0000 C 0 0 1 0 0 0_x000D_ -1.3088 1.5158 0.0000 N 0 0_x000D_ -0.0105 0.7627 0.0000 C 0 0 1 0 0 0_x000D_ 7.7…	MMV637572	Lopinavir	192725-17-0	CC(C)[C@H](N1CCCNC1)C(=O)N[C@@H](Cc2ccccc2)C(=O)[C@@H](O)[C@H](Cc3ccccc3)NC(=O)COc4c(C)cccc4C	(2S)-2-(1,3-diazinan-1-yl)-N-[(2S,4S,5S)-5-[[2-(2,6-dimethylphenoxy)acetyl]amino]-4-hydroxy-3-oxo-1,6-diphenylhexan-2-yl]-3-methylbutanamide	C37 H48 N4 O5	628.801	Anti-infective agent - Anti-HIV agent	doi.org/10.1101/2020.03.20.999730
License Error_x000D_ SciTegic06052009092D_x000D_ _x000D_ 37 41 0 0 0 0 999 V2000_x000D_ 18.4382 2.0939 0.0000 C 0 0_x000D_ 19.9382 2.0939 0.0000 N 0 0_x000D_ 11.6893 0.7793 0.0000 C 0 0_x000D_ 16.1843 3.3899 0.0000 C 0 0_x000D_ 17.6852 3.3920 0.0000 N 0 0_x000D_ 13.1901 0.7823 0.0000 N 0 0_x000D_ 20.6882 0.7948 0.0000 C 0 0_x000D_ 7.2001 -4.4287 0.0000 N 0 0_x000D_ 15.4387 2.0882 0.0000 C 0 0_x00…	MMV009948	Imatinib	152459-95-5 220127-57-1	CN1CCN(Cc2ccc(cc2)C(=O)Nc3ccc(C)c(Nc4nccc(n4)c5cccnc5)c3)CC1	4-[(4-methylpiperazin-1-yl)methyl]-N-[4-methyl-3-[(4-pyridin-3-ylpyrimidin-2-yl)amino]phenyl]benzamide	C29 H31 N7 O	493.603	Antitumor agent - Leukemia	doi.org/10.1101/2020.03.25.008482.
License Error_x000D_ SciTegic06082004062D_x000D_ _x000D_ 30 33 0 0 0 0 999 V2000_x000D_ 5.0000 -5.0000 0.0000 O 0 0_x000D_ 5.8250 -5.0000 0.0000 C 0 0_x000D_ 6.2375 -5.7145 0.0000 C 0 0_x000D_ 7.0625 -5.7146 0.0000 N 0 0_x000D_ 7.4749 -6.4290 0.0000 C 0 0_x000D_ 8.3000 -6.4291 0.0000 C 0 0_x000D_ 8.7125 -5.7146 0.0000 N 0 0_x000D_ 9.5375 -5.7147 0.0000 C 0 0_x000D_ 9.9500 -6.4292 0.0000 C 0 0_x00…	MMV001829	Fluphenazine	146-56-5 69-23-8	OCCN1CCN(CCCN2c3ccccc3Sc4ccc(cc24)C(F)(F)F)CC1	2-[4-[3-[2-(trifluoromethyl)phenothiazin-10-yl]propyl]piperazin-1-yl]ethanol	C22 H26 F3 N3 O S	437.528	Nervous system agent - Antipsychotic	doi.org/10.1101/2020.03.25.008482.
License Error_x000D_ SciTegic06082004062D_x000D_ _x000D_ 26 28 0 0 0 0 999 V2000_x000D_ 2.5800 -1.5256 0.0000 O 0 0_x000D_ 1.2990 -0.7452 0.0000 C 0 0_x000D_ 1.2990 -2.2452 0.0000 C 0 0_x000D_ 0.0000 -2.9952 0.0000 C 0 0_x000D_ -1.2990 -2.2452 0.0000 N 0 0_x000D_ -2.6003 -2.9928 0.0000 C 0 0_x000D_ -3.8990 -2.2407 0.0000 C 0 0_x000D_ -5.2003 -2.9884 0.0000 C 0 0_x000D_ -6.4990 -2.2361 0.0000 C 0 …	MMV001635	Haloperidol	52-86-8	OC1(CCN(CCCC(=O)c2ccc(F)cc2)CC1)c3ccc(Cl)cc3	4-[4-(4-chlorophenyl)-4-hydroxypiperidin-1-yl]-1-(4-fluorophenyl)butan-1-one	C21 H23 Cl F N O2	375.864	Nervous system agent - Schizophrenia	doi.org/10.4414/smw.2020.20235
License Error_x000D_ SciTegic06082004062D_x000D_ _x000D_ 30 33 0 0 1 0 999 V2000_x000D_ 5.7805 7.4229 0.0000 C 0 0_x000D_ 5.2956 6.7555 0.0000 C 0 0_x000D_ 4.4751 6.8417 0.0000 C 0 0_x000D_ 5.6311 6.0018 0.0000 O 0 0_x000D_ 5.1462 5.3344 0.0000 C 0 0_x000D_ 5.4818 4.5807 0.0000 C 0 0_x000D_ 4.9968 3.9132 0.0000 C 0 0_x000D_ 4.1764 3.9995 0.0000 C 0 0_x000D_ 3.6914 3.3320 0.0000 C 0 0_x000D_ 3.946…	MMV1580492	Ozanimod	1306760-87-1	CC(C)Oc1ccc(cc1C#N)c2onc(n2)c3cccc4[C@H](CCc34)NCCO	5-[3-[(1S)-1-(2-hydroxyethylamino)-2,3-dihydro-1H-inden-4-yl]-1,2,4-oxadiazol-5-yl]-2-propan-2-yloxybenzonitrile	C23 H24 N4 O3	404.462	Pharmaceutical immune agent - Multiple sclerosis	clinicaltrials.gov/ct2/show/NCT04405102
ELEMENTL06082013002D 27 30 0 0 0 0 999 V2000 -2.9025 -0.9398 0.0000 C 0 0 0 0 0 0 0 0 0 0 0 0 -3.2363 0.5226 0.0000 C 0 0 0 0 0 0 0 0 0 0 0 0 -3.8377 -2.1126 0.0000 C 0 0 0 0 0 0 0 0 0 0 0 0 -1.4393 -1.2738 0.0000 C 0 0 0 0 0 0 0 0 0 0 0 0 -4.5877 1.1734 0.0000 C 0 0 0 0 0 0 0 0 0 0 0 0 -1.9964 1.3687 0.0000 C 0 0 0 0 0 0 0 0 0 0 0 0 -5.3377 -2.1126 0.0000 C 0 0 0 0 0 0 0 0 0 0 0 0 -3.0877 -3.412…	MMV002229	Loratidine	79794-75-5	CCOC(=O)N1CCC(=C2c3ccc(Cl)cc3CCc4cccnc24)CC1	ethyl 4-(13-chloro-4-azatricyclo[9.4.0.03,8]pentadeca-1(11),3(8),4,6,12,14-hexaen-2-ylidene)piperidine-1-carboxylate	C22 H23 Cl N2 O2	382.883	Pharmaceutical immune agent - Antihystaminic	doi.org/10.21203/rs.3.rs-23951/v1
License Error_x000D_ SciTegic06082004062D_x000D_ _x000D_ 51 57 0 0 1 0 999 V2000_x000D_ -2.3383 -3.2496 0.0000 F 0 0_x000D_ -1.2990 -2.6496 0.0000 C 0 0_x000D_ -1.2990 -1.1496 0.0000 C 0 0_x000D_ 0.0000 -0.3996 0.0000 C 0 0_x000D_ 1.2990 -1.1496 0.0000 C 0 0_x000D_ 1.2990 -2.6496 0.0000 C 0 0_x000D_ 0.0000 -3.3996 0.0000 C 0 0_x000D_ 2.3383 -3.2496 0.0000 F 0 0_x000D_ -2.5978 -0.3966 0.0000 C 0 0…	MMV688774	Posaconazole	171228-49-2	CC[C@@H]([C@H](C)O)N1N=CN(C1=O)c2ccc(cc2)N3CCN(CC3)c4ccc(OC[C@@H]5CO[C@](Cn6cncn6)(C5)c7ccc(F)cc7F)cc4	4-[4-[4-[4-[[(3R,5R)-5-(2,4-difluorophenyl)-5-(1,2,4-triazol-1-ylmethyl)oxolan-3-yl]methoxy]phenyl]piperazin-1-yl]phenyl]-2-[(2S,3S)-2-hydroxypentan-3-yl]-1,2,4-triazol-3-one	C37 H42 F2 N8 O4	700.777	Anti-infective agent - Antifungal	doi.org/10.21203/rs.3.rs-23951/v1
License Error_x000D_ SciTegic06052009092D_x000D_ _x000D_ 37 42 0 0 0 0 999 V2000_x000D_ 5.7119 -10.1209 0.0000 C 0 0_x000D_ 5.7119 -10.9483 0.0000 C 0 0_x000D_ 6.4260 -11.3578 0.0000 C 0 0_x000D_ 7.1411 -10.9483 0.0000 C 0 0_x000D_ 7.1400 -10.1209 0.0000 C 0 0_x000D_ 6.4260 -9.7031 0.0000 C 0 0_x000D_ 7.8541 -11.3587 0.0000 N 0 0_x000D_ 8.5699 -10.9485 0.0000 C 0 0_x000D_ 8.5697 -10.1191 0.0000 C…	MMV000025	Pyronaridine	74847-35-1 76748-86-2	COc1ccc2nc3cc(Cl)ccc3c(Nc4cc(CN5CCCC5)c(O)c(CN6CCCC6)c4)c2n1	4-[(7-chloro-2-methoxybenzo[b][1,5]naphthyridin-10-yl)amino]-2,6-bis(pyrrolidin-1-ylmethyl)phenol	C29 H32 Cl N5 O2	518.061	Anti-infective agent - Antimalarial	doi.org/10.1101/2020.03.20.999730
